# Supplementary material for: Integrated Community Care Delivered by Public Health-Care and Social-Care Systems: Results from a Realist Synthesis
Source: PubMed Central journal article supplement (PMC10870956; doi:10.5334/ijic.7042), 2024-02-16
Supplement: ijic-24-1-7042-s2.pdf [file ijic-24-1-7042-s2.pdf]

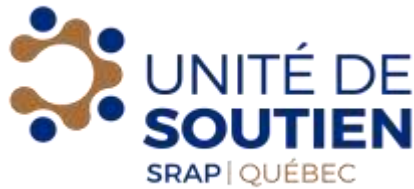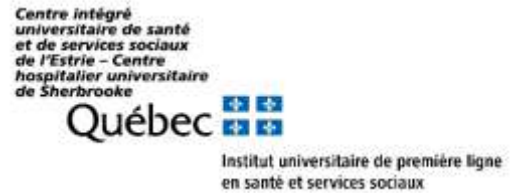

# Systematic review and Realistic synthesis: Integrated Community care delivered by public health care and social care systems

## *Search strategy*

Health and Social Services Systems, Knowledge Translation and Implementation component of the Quebec SPOR-SUPPORT Unit  
Institut universitaire de première ligne en santé et services sociaux du CIUSSS de l'Estrie - CHUS

9 février 2021

Nathalie Rheault, M.S.I., Information Specialist  
Francis Lacasse, Information Specialist  
Hervé Zomahoun, PhD  
Delwende-Fatim-Laure Jasmin-Sawadego  
Jean-François Allaire  
Yacine Thiam, PhD  
Paul Morin, PhD

## Table des matières

|                                                     |    |
|-----------------------------------------------------|----|
| Ovid Medline (2021-02-02).....                      | 4  |
| Embase (embase.com) (2021-02-03).....               | 6  |
| EBSCOhost Cinahl (2021-02-04).....                  | 9  |
| Ovid PsycINFO (2021-02-04).....                     | 13 |
| Proquest - Sociological Abstracts (2021-02-04)..... | 17 |
| Web of Science Core Collection (2021-02-04).....    | 22 |
| Érudit (2021-02).....                               | 24 |
| Request No 1 : English .....                        | 24 |
| Request No 2 : English -Update .....                | 25 |
| Request no 3 : French .....                         | 26 |
| Request no 4 : French - Update .....                | 27 |
| Cairn .....                                         | 28 |
| Request in English .....                            | 28 |
| Request in English-Update.....                      | 29 |
| Request in French .....                             | 29 |
| Request in French-Update .....                      | 30 |
| Consulted References .....                          | 31 |

## Search strategy

### Research questions:

For the systematic review: *to identify and characterize the integrated community care interventions delivered by public health care and social care systems as well as outcomes related.*

For the realistic synthesis: How, why, for whom, and in what contexts do ICCs deployed by the public health and social care work and produce outcomes?

**Population:** all or major groups of the population (e.g., seniors, families, residents of social housing complexes) that is home to vulnerable or marginalized populations (material or social disadvantages) within specific local areas

**Intervention:** Localized community-based health care, Localized community-based social care, or both integrated at the local area level

**Comparator:** Not applicable

**Outcomes:** Improved health and well-being of individuals and communities, improved health equity, improved community social capital, social networks, social cohesion, participation in co-production, improved accessibility, availability, and continuity of health care and social care, action on social determinants of health

**Setting:** Public providers and local area

**Study design:** Not applicable

### Databases

1. Medline
2. Embase
3. CINAHL
4. PsycINFO
5. Sociological Abstracts
6. Web of Science
7. Érudit
8. Cairn

### Grey Literature

1. Google Scholar

## Ovid Medline (2021-02-02)

| Concepts                                                                                 | Search strategy keywords                                                                                                                                                                                                                                                                                                             | Number | # Results |
|------------------------------------------------------------------------------------------|--------------------------------------------------------------------------------------------------------------------------------------------------------------------------------------------------------------------------------------------------------------------------------------------------------------------------------------|--------|-----------|
| Community care -<br>Interventions et<br>soins de proximate<br>(Controlled<br>vocabulary) | Not available                                                                                                                                                                                                                                                                                                                        | -      | -         |
| Community care -<br>Interventions et<br>soins de proximate<br>(Free vocabulary)          | ((("place based" or "community based" or "area based" or local or proxim* or district* or zone* or territor* or neighbo?rhood) adj3 (approach* or care or healthcare or initiative* or innovation* or intervention* or program* or "health service*" or "social service*" or "healthcare service*" or "care service*")).ti,ab,kw,kf. | #1     | 38 086    |
|                                                                                          | ((outreach* or "out-reach*" or "reaching out") adj3 (approach* or care or healthcare or initiative* or innovation* or intervention* or program* or "health service*" or "social service*" or "healthcare service*" or "care service*")).ti,ab,kw,kf.                                                                                 | #2     | 4 052     |
| Community care -<br>Interventions et<br>soins de proximate<br>Total                      | 1 or 2                                                                                                                                                                                                                                                                                                                               | #3     | 41 817    |
| Deprived area -<br>Territoire<br>défavorisé<br>(Controlled<br>vocabulary)                | Vulnerable Populations/ or exp Poverty/ or Unemployment/ or Minority Groups/ or exp disabled persons/ or exp ethnic groups/ or working poor/ or Refugees/ or Healthcare Disparities/ or health status disparities/ or exp Aged/                                                                                                      | #4     | 3 445 946 |
| Deprived area -<br>Territoire<br>défavorisé (Free<br>vocabulary)                         | ("cultural communit*" or depriv* or disabled or disadvantaged or disparit* or elder* or hard-to-reach or inequalit* or inequit* or "low income" or marginal* or poverty or refugee* or senior* or sensitive* or underserved or unemploy* or vulnerable* ).ti,ab,kw,kf                                                                | #5     | 1 479 366 |
|                                                                                          | ((("at-risk" or poor) adj2 (population* or child* or group* or person* or wom?n or m?n)).ti,ab,kw,kf.                                                                                                                                                                                                                                | #6     | 46 767    |
|                                                                                          | ((minority or ethnic* or racial) adj2 (group or groups or population*)).ti,ab,kw,kf.                                                                                                                                                                                                                                                 | #7     | 56 062    |

| Concepts                                | Search strategy keywords                                                                                                                                                                                                                                                                                                                                                                                                                                                                                                                                 | Number | # Results |
|-----------------------------------------|----------------------------------------------------------------------------------------------------------------------------------------------------------------------------------------------------------------------------------------------------------------------------------------------------------------------------------------------------------------------------------------------------------------------------------------------------------------------------------------------------------------------------------------------------------|--------|-----------|
|                                         | ((aged or old* or ageing or aging) adj2 (adult* or people or person# or population*)).ti,ab,kw,kf.                                                                                                                                                                                                                                                                                                                                                                                                                                                       | #8     | 210 511   |
|                                         | (social adj2 (disaffiliation or distance or exclusion or isolation or loneliness)).ti,ab,kw,kf                                                                                                                                                                                                                                                                                                                                                                                                                                                           | #9     | 11 866    |
|                                         | 5 or 6 or 7 or 8 or 9                                                                                                                                                                                                                                                                                                                                                                                                                                                                                                                                    | #10    | 1 723 597 |
| Territoire défavorisé                   | 4 or 10                                                                                                                                                                                                                                                                                                                                                                                                                                                                                                                                                  | #11    | 4 660 354 |
| Integrated care (Controlled vocabulary) | exp "Delivery of Health Care, Integrated"/ or exp Comprehensive Health Care/ or intersectoral collaboration/ or Cooperative Behavior/ or interdisciplinary communication/ or Interinstitutional Relations/                                                                                                                                                                                                                                                                                                                                               | #12    | 372 522   |
| Integrated care (Free vocabulary)       | ((collabor* or comprehensive* or cooperat* or coordinat* or co-ord* or "cross disciplin*" or "cross sector*" or "cross institution*" or interagenc* or "inter agenc*" or integrat* or interdisciplin* or "inter disciplin*" or interinstitut* or "inter institut*" or "inter organi?ation*" or interorgani?ation* or interprofession* or "inter profession*" or intersector* or "inter sector*" or multidisciplin* or multi or partnership*) adj2 (care or deliver* or health* or management or model* or program* or service* or system?)).ti,ab,kw,kf. | #13    | 171 409   |
|                                         | (multicare or multiclinic or multiprogram* or multiservice or multicare or "multi team" or multiteam or "shared care").ti,ab,kw,kf.                                                                                                                                                                                                                                                                                                                                                                                                                      | #14    | 1 872     |
|                                         | 13 or 14                                                                                                                                                                                                                                                                                                                                                                                                                                                                                                                                                 | #15    | 172 894   |
| Integrated care                         | 12 or 15                                                                                                                                                                                                                                                                                                                                                                                                                                                                                                                                                 | #16    | 515 408   |
| Total                                   | 3 and 11 and 16                                                                                                                                                                                                                                                                                                                                                                                                                                                                                                                                          | #17    | 3 111     |
| Filter for date                         | limit 17 to yr="2003 -Current"                                                                                                                                                                                                                                                                                                                                                                                                                                                                                                                           | #18    | 2 486     |
| Update                                  | limit 18 to yr="2019 -Current"                                                                                                                                                                                                                                                                                                                                                                                                                                                                                                                           | #19    | 443       |

| Concepts                                                                                                                                                                                                                                                                                                                                   | Search strategy keywords | Number | # Results |
|--------------------------------------------------------------------------------------------------------------------------------------------------------------------------------------------------------------------------------------------------------------------------------------------------------------------------------------------|--------------------------|--------|-----------|
| This search strategy does not retrieve the following articles: 1) Lopez, P. M., Islam, N., Feinberg, A., Myers, C., Seidl, L., Drackett, E., ... & Wyka, K. (2017). A place-based community health worker program: feasibility and early outcomes, New York City, 2015. <i>American journal of preventive medicine</i> , 52(3), S284-S289. |                          |        |           |

### Embase (embase.com) (2021-02-03)

| Concepts                                                                                 | Search strategy keywords                                                                                                                                                                                                                                                                                                                                                                                                                                                                                                                                                                    | Number | # Results |
|------------------------------------------------------------------------------------------|---------------------------------------------------------------------------------------------------------------------------------------------------------------------------------------------------------------------------------------------------------------------------------------------------------------------------------------------------------------------------------------------------------------------------------------------------------------------------------------------------------------------------------------------------------------------------------------------|--------|-----------|
| Community care -<br>Interventions et<br>soins de proximite<br>(Controlled<br>vocabulary) | Not available                                                                                                                                                                                                                                                                                                                                                                                                                                                                                                                                                                               | -      | -         |
| Community care -<br>Interventions et<br>soins de proximite<br>(Free vocabulary)          | (("place based" or "community based" or "area based" or local or proxim* or district* or zone* or territor* or neighbo*hood) NEAR/3 (approach* or care or healthcare or initiative* or innovation* or intervention* or program* or "health service*" or "social service*" or "healthcare service*" or "care service*")):ti,ab,kw                                                                                                                                                                                                                                                            | #1     | 51 252    |
|                                                                                          | ((outreach* or "out-reach*" or "reaching out") NEAR/3 (approach* or care or healthcare or initiative* or innovation* or intervention* or program* or "health service*" or "social service*" or "healthcare service*" or "care service*")):ti,ab,kw                                                                                                                                                                                                                                                                                                                                          | #2     | 5 978     |
| Community care -<br>Interventions et<br>soins de proximite<br>Total                      | #1 or #2                                                                                                                                                                                                                                                                                                                                                                                                                                                                                                                                                                                    | #3     | 56 765    |
| Deprived area -<br>Territoire<br>défavorisé<br>(Controlled<br>vocabulary)                | 'aged'/de OR 'aged hospital patient'/de OR 'aging'/exp OR 'cultural deprivation'/de OR 'disabled person'/exp OR 'disparities'/de OR 'disparity'/de OR 'ethnic group'/exp OR 'frail elderly'/de OR 'inequalities'/de OR 'inequalities women'/de OR 'inequality'/de OR 'institutionalized elderly'/de OR 'loneliness'/exp OR 'lowest income group'/exp OR 'medically underserved'/de OR 'minority group'/de OR 'poverty'/de OR 'refugee'/exp OR 'social exclusion'/exp OR 'social isolation'/exp OR 'unemployment'/de OR 'very elderly'/de OR 'vulnerable population'/de OR 'working poor'/de | #4     | 3 750 411 |

| Concepts                                                         | Search strategy keywords                                                                                                                                                                                                                                                                                                                                                                                                                                                                                                                                         | Number | # Results |
|------------------------------------------------------------------|------------------------------------------------------------------------------------------------------------------------------------------------------------------------------------------------------------------------------------------------------------------------------------------------------------------------------------------------------------------------------------------------------------------------------------------------------------------------------------------------------------------------------------------------------------------|--------|-----------|
| Deprived area -<br>Territoire<br>défavorisé (Free<br>vocabulary) | ("cultural communit*" or depriv* or disabled or disadvantaged or disparit* or elder* or "hard-to-reach" or inequalit* or inequit* or "low income" or marginal* or poverty or refugee* or senior* or sensitive* or underserved or unemploy* or vulnerable*):ti,ab,kw                                                                                                                                                                                                                                                                                              | #5     | 1 905 667 |
|                                                                  | ((("at-risk" or poor) NEAR/2 (population* or child* or group* or person* or wom*n or man or men)):ti,ab,kw                                                                                                                                                                                                                                                                                                                                                                                                                                                       | #6     | 91 553    |
|                                                                  | ((minority or ethnic* or racial) NEAR/2 (group or groups or population*)):ti,ab,kw                                                                                                                                                                                                                                                                                                                                                                                                                                                                               | #7     | 72 156    |
|                                                                  | ((aged or old* or ageing or aging) NEAR/2 (adult* or people or person or persons or population*)):ti,ab,kw                                                                                                                                                                                                                                                                                                                                                                                                                                                       | #8     | 280 919   |
|                                                                  | (social NEAR/2 (disaffiliation or distance or exclusion or isolation or loneliness)):ti,ab,kw                                                                                                                                                                                                                                                                                                                                                                                                                                                                    | #9     | 16 060    |
|                                                                  | #5 or #6 or #7 or #8 or #9                                                                                                                                                                                                                                                                                                                                                                                                                                                                                                                                       | #10    | 2 249 458 |
| Territoire<br>défavorisé                                         | #4 or #10                                                                                                                                                                                                                                                                                                                                                                                                                                                                                                                                                        | #11    | 5 286 690 |
| Integrated care<br>(Controlled<br>vocabulary)                    | 'collaboration'/de or 'collaborative care team'/de OR 'cooperation'/exp OR 'coordination'/de OR 'integrated health care system'/de OR 'integration'/de OR 'interprofessional'/de OR 'interprofessional collaboration'/de OR 'intersectoral collaboration'/de OR 'multidisciplinary team'/de OR 'partnership'/de                                                                                                                                                                                                                                                  | #12    | 104 236   |
| Integrated care<br>(Free vocabulary)                             | ((collabor* or comprehensive* or cooperat* or coordinat* or co-ord* or "cross disciplin*" or "cross sector*" or "cross institution*" or interagenc* or "inter agenc*" or integrat* or interdisciplin* or "inter disciplin*" or interinstitut* or "inter institut*" or "inter organi*ation*" or interorgani*ation* or interprofession* or "inter profession*" or intersector* or "inter sector*" or multidisciplin* or multi or partnership*) NEAR/2 (care or deliver* or health* or management or model* or program* or service* or system or systems)):ti,ab,kw | #13    | 233 214   |
|                                                                  | (multicare or multiclinic or multiprogram* or multiservice or multicare or "multi team" or multiteam or "shared care"):ti,ab,kw                                                                                                                                                                                                                                                                                                                                                                                                                                  | #14    | 3 133     |
|                                                                  | #13 or #14                                                                                                                                                                                                                                                                                                                                                                                                                                                                                                                                                       | #15    | 235 542   |

| <b>Concepts</b> | <b>Search strategy keywords</b>                         | <b>Number</b> | <b># Results</b> |
|-----------------|---------------------------------------------------------|---------------|------------------|
| Integrated care | #12 or #15                                              | #16           | 322 284          |
| Total           | #3 and #11 and #16                                      | #17           | 2 431            |
| Filter for date | #3 AND #11 AND #16 AND [2003-2019]/py                   | #18           | 2 165            |
| Update          | #3 AND #11 AND #16 AND [17-9-2019]/sd NOT [5-2-2021]/sd | #19           | 390              |



**EBSCOhost Cinahl (2021-02-04)**

| <b>Concepts</b>                                                                          | <b>Search strategy keywords</b>                                                                                                                                                                                                                                                                                                                                                                                                                                                                                                                                                                                                                                                                                                                                                                                                                                                                                                                                                                       | <b>Number</b> | <b># Results</b> |
|------------------------------------------------------------------------------------------|-------------------------------------------------------------------------------------------------------------------------------------------------------------------------------------------------------------------------------------------------------------------------------------------------------------------------------------------------------------------------------------------------------------------------------------------------------------------------------------------------------------------------------------------------------------------------------------------------------------------------------------------------------------------------------------------------------------------------------------------------------------------------------------------------------------------------------------------------------------------------------------------------------------------------------------------------------------------------------------------------------|---------------|------------------|
| Community care -<br>Interventions et<br>soins de proximite<br>(Controlled<br>vocabulary) | Not available                                                                                                                                                                                                                                                                                                                                                                                                                                                                                                                                                                                                                                                                                                                                                                                                                                                                                                                                                                                         | -             | -                |
| Community care -<br>Interventions et<br>soins de proximite<br>(Free vocabulary)          | <p>TI ( ("place based" or "community based" or "area based" or local or proxim* or district* or zone* or territor* or neighbo#rhood) N2 (approach* or care or healthcare or initiative* or innovation* or intervention* or program* or "health service*" or "social service*" or "healthcare service*" or "care service*" )</p> <p>OR AB ( ("place based" or "community based" or "area based" or local or proxim* or district* or zone* or territor* or neighbo#rhood) N2 (approach* or care or healthcare or initiative* or innovation* or intervention* or program* or "health service*" or "social service*" or "healthcare service*" or "care service*" )</p> <p>OR SU ( ("place based" or "community based" or "area based" or local or proxim* or district* or zone* or territor* or neighbo#rhood) N2 (approach* or care or healthcare or initiative* or innovation* or intervention* or program* or "health service*" or "social service*" or "healthcare service*" or "care service*" )</p> | #1            | 20 191           |
|                                                                                          | <p>TI ( (outreach* or "out-reach*" or "reaching out") N2 (approach* or care or healthcare or initiative* or innovation* or intervention* or program* or "health service*" or "social service*" or "healthcare service*" or "care service*" )</p> <p>OR AB ( (outreach* or "out-reach*" or "reaching out") N2 (approach* or care or healthcare or initiative* or innovation* or intervention* or program* or "health service*" or "social service*" or "healthcare service*" or "care service*" )</p> <p>OR SU ( (outreach* or "out-reach*" or "reaching out") N2 (approach* or care or healthcare or initiative* or innovation* or intervention* or program* or "health service*" or "social service*" or "healthcare service*" or "care service*" )</p>                                                                                                                                                                                                                                              | #2            | 2 546            |
| Community care -<br>Interventions et                                                     | S1 or S2                                                                                                                                                                                                                                                                                                                                                                                                                                                                                                                                                                                                                                                                                                                                                                                                                                                                                                                                                                                              | #3            | 22 540           |

| Concepts                                                                  | Search strategy keywords                                                                                                                                                                                                                                                                                                                                                                                                                                                                                                                                                                                                                                                                                                                                                                                      | Number | # Results |
|---------------------------------------------------------------------------|---------------------------------------------------------------------------------------------------------------------------------------------------------------------------------------------------------------------------------------------------------------------------------------------------------------------------------------------------------------------------------------------------------------------------------------------------------------------------------------------------------------------------------------------------------------------------------------------------------------------------------------------------------------------------------------------------------------------------------------------------------------------------------------------------------------|--------|-----------|
| soins de proximité<br>Total                                               |                                                                                                                                                                                                                                                                                                                                                                                                                                                                                                                                                                                                                                                                                                                                                                                                               |        |           |
| Deprived area -<br>Territoire<br>défavorisé<br>(Controlled<br>vocabulary) | (MH "Aged+") OR (MH "Aging+") OR (MH "Cultural Deprivation") OR (MH "Disabled+") OR (MH "Ethnic Groups+") OR (MH "Healthcare Disparities") OR (MH "Health Status Disparities") OR (MH "Loneliness") OR (MH "Medically Underserved") OR (MH "Medically Underserved Area") OR (MH "Minority Groups") OR (MH "Poverty") OR (MH "Psychosocial Deprivation") OR (MH "Refugees") OR (MH "Social Isolation+") OR (MH "Social Isolation (NANDA)") OR (MH "Social Isolation (Saba CCC)") OR (MH "Unemployment") OR (MH "Vulnerability")                                                                                                                                                                                                                                                                                | #4     | 1 070 438 |
| Deprived area -<br>Territoire<br>défavorisé (Free<br>vocabulary)          | TI ( "cultural communit*" or depriv* or disabled or disadvantaged or disparit* or elder* or hard-to-reach or inequalit* or inequit* or "low income" or marginal* or poverty or refugee* or senior* or sensitive* or underserved or unemploy* or vulnerable* )<br><br>OR AB ( "cultural communit*" or depriv* or disabled or disadvantaged or disparit* or elder* or hard-to-reach or inequalit* or inequit* or "low income" or marginal* or poverty or refugee* or senior* or sensitive* or underserved or unemploy* or vulnerable* )<br><br>OR SU ( "cultural communit*" or depriv* or disabled or disadvantaged or disparit* or elder* or hard-to-reach or inequalit* or inequit* or "low income" or marginal* or poverty or refugee* or senior* or sensitive* or underserved or unemploy* or vulnerable* ) | #5     | 450 662   |
|                                                                           | TI ( ("at-risk" or poor) N1 (population* or child* or group* or person* or wom#n or m#n) )<br><br>OR AB ( ("at-risk" or poor) N1 (population* or child* or group* or person* or wom#n or m#n) )<br><br>OR SU ( ("at-risk" or poor) N1 (population* or child* or group* or person* or wom#n or m#n) )                                                                                                                                                                                                                                                                                                                                                                                                                                                                                                          | #6     | 68 130    |
|                                                                           | TI ( (minority or ethnic* or racial) N1 (group or groups or population*) )<br><br>OR AB ( (minority or ethnic* or racial) N1 (group or groups or population*) )<br><br>OR SU ( (minority or ethnic* or racial) N1 (group or groups or population*) )                                                                                                                                                                                                                                                                                                                                                                                                                                                                                                                                                          | #7     | 51 403    |

| Concepts                                | Search strategy keywords                                                                                                                                                                                                                                                                                                                                                                                                                                                                                                                                                                                                                                                                                                                                                                                                                                                                                                                                                                                                                                                                                                                                                                                                                                                                                                                                                                                                                                                                           | Number | # Results |
|-----------------------------------------|----------------------------------------------------------------------------------------------------------------------------------------------------------------------------------------------------------------------------------------------------------------------------------------------------------------------------------------------------------------------------------------------------------------------------------------------------------------------------------------------------------------------------------------------------------------------------------------------------------------------------------------------------------------------------------------------------------------------------------------------------------------------------------------------------------------------------------------------------------------------------------------------------------------------------------------------------------------------------------------------------------------------------------------------------------------------------------------------------------------------------------------------------------------------------------------------------------------------------------------------------------------------------------------------------------------------------------------------------------------------------------------------------------------------------------------------------------------------------------------------------|--------|-----------|
|                                         | TI ( (aged or old* or ageing or aging) N1 (adult* or people or person# or population*) )<br>OR AB ( (aged or old* or ageing or aging) N1 (adult* or people or person# or population*) )<br>OR SU ( (aged or old* or ageing or aging) N1 (adult* or people or person# or population*) )                                                                                                                                                                                                                                                                                                                                                                                                                                                                                                                                                                                                                                                                                                                                                                                                                                                                                                                                                                                                                                                                                                                                                                                                             | #8     | 123 523   |
|                                         | TI ( (social) N1 (disaffiliation or distance or exclusion or isolation or loneliness) )<br>OR AB ( (social) N1 (disaffiliation or distance or exclusion or isolation or loneliness) )<br>OR SU ( (social) N1 (disaffiliation or distance or exclusion or isolation or loneliness) )                                                                                                                                                                                                                                                                                                                                                                                                                                                                                                                                                                                                                                                                                                                                                                                                                                                                                                                                                                                                                                                                                                                                                                                                                | #9     | 12 935    |
|                                         | S5 or S6 or S7 or S8 or S9                                                                                                                                                                                                                                                                                                                                                                                                                                                                                                                                                                                                                                                                                                                                                                                                                                                                                                                                                                                                                                                                                                                                                                                                                                                                                                                                                                                                                                                                         | #10    | 638 953   |
| Territoire défavorisé                   | S4 or S10                                                                                                                                                                                                                                                                                                                                                                                                                                                                                                                                                                                                                                                                                                                                                                                                                                                                                                                                                                                                                                                                                                                                                                                                                                                                                                                                                                                                                                                                                          | #11    | 1 352 932 |
| Integrated care (Controlled vocabulary) | (MH "Collaboration") OR (MH "Cooperative Behavior") OR (MH "Health Care Delivery, Integrated") OR (MH "Interinstitutional Relations") OR (MH "Interprofessional Relations") OR (MH "Multidisciplinary Care Team") OR (MH "Shared Services, Health Care")                                                                                                                                                                                                                                                                                                                                                                                                                                                                                                                                                                                                                                                                                                                                                                                                                                                                                                                                                                                                                                                                                                                                                                                                                                           | #12    | 130 207   |
| Integrated care (Free vocabulary)       | TI ( (collabor* or comprehensive* or cooperat* or coordinat* or co-ord* or "cross disciplin*" or "cross sector*" or "cross institution*" or interagenc* or "inter agenc*" or integrat* or interdisciplin* or "inter disciplin*" or interinstitut* or "inter institut*" or "inter organi#ation*" or interorgani#ation* or interprofession* or "inter profession*" or intersector* or "inter sector*" or multidisciplin* or multi or partnership*) N1 (care or deliver* or health* or management or model* or program* or service* or system#) )<br><br>OR AB ( (collabor* or comprehensive* or cooperat* or coordinat* or co-ord* or "cross disciplin*" or "cross sector*" or "cross institution*" or interagenc* or "inter agenc*" or integrat* or interdisciplin* or "inter disciplin*" or interinstitut* or "inter institut*" or "inter organi#ation*" or interorgani#ation* or interprofession* or "inter profession*" or intersector* or "inter sector*" or multidisciplin* or multi or partnership*) N1 (care or deliver* or health* or management or model* or program* or service* or system#) )<br><br>OR SU ( (collabor* or comprehensive* or cooperat* or coordinat* or co-ord* or "cross disciplin*" or "cross sector*" or "cross institution*" or interagenc* or "inter agenc*" or integrat* or interdisciplin* or "inter disciplin*" or interinstitut* or "inter institut*" or "inter organi#ation*" or interorgani#ation* or interprofession* or "inter profession*" or intersector* | #13    | 126 686   |

| Concepts        | Search strategy keywords                                                                                                                                                                                                                                                                                                                                                                                | Number | # Results |
|-----------------|---------------------------------------------------------------------------------------------------------------------------------------------------------------------------------------------------------------------------------------------------------------------------------------------------------------------------------------------------------------------------------------------------------|--------|-----------|
|                 | or "inter sector*" or multidisciplin* or multi or partnership*) N1 (care or deliver* or health* or management or model* or program* or service* or system#) )                                                                                                                                                                                                                                           |        |           |
|                 | TI ( multicare or multiclinic or multiprogram* or multiservice or multicare or "multi team" or multiteam or "shared care" )<br><br>OR AB ( multicare or multiclinic or multiprogram* or multiservice or multicare or "multi team" or multiteam or "shared care" )<br><br>OR SU ( multicare or multiclinic or multiprogram* or multiservice or multicare or "multi team" or multiteam or "shared care" ) | #14    | 1 084     |
|                 | S13 or S14                                                                                                                                                                                                                                                                                                                                                                                              | #15    | 127 430   |
| Integrated care | S12 or S15                                                                                                                                                                                                                                                                                                                                                                                              | #16    | 193 554   |
| Total           | S3 and S11 and S16                                                                                                                                                                                                                                                                                                                                                                                      | #17    | 1 596     |
| Filter for date | Opérateurs de restriction - Date de publication: 20030101-                                                                                                                                                                                                                                                                                                                                              | #18    | 1 441     |
| Update          | Opérateurs de restriction - Date de publication: 201909-                                                                                                                                                                                                                                                                                                                                                | #19    | 189       |

## Ovid PsycINFO (2021-02-04)

| Concepts                                                                                 | Search strategy keywords                                                                                                                                                                                                                                                                                                                                                                                                                                                                                                                                                                                                                                                                                                                                                                                                                                                                                                                                                                                       | Number | # Results |
|------------------------------------------------------------------------------------------|----------------------------------------------------------------------------------------------------------------------------------------------------------------------------------------------------------------------------------------------------------------------------------------------------------------------------------------------------------------------------------------------------------------------------------------------------------------------------------------------------------------------------------------------------------------------------------------------------------------------------------------------------------------------------------------------------------------------------------------------------------------------------------------------------------------------------------------------------------------------------------------------------------------------------------------------------------------------------------------------------------------|--------|-----------|
| Community care -<br>Interventions et<br>soins de proximite<br>(Controlled<br>vocabulary) | Not available                                                                                                                                                                                                                                                                                                                                                                                                                                                                                                                                                                                                                                                                                                                                                                                                                                                                                                                                                                                                  | -      | -         |
| Community care -<br>Interventions et<br>soins de proximite<br>(Free vocabulary)          | <p>((("place based" or "community based" or "area based" or local or proxim* or district* or zone* or territor* or neighbo?rhood) adj3 (approach* or care or healthcare or initiative* or innovation* or intervention* or program* or "health service*" or "social service*" or "healthcare service*" or "care service*")).ti.</p> <p>or ((("place based" or "community based" or "area based" or local or proxim* or district* or zone* or territor* or neighbo?rhood) adj3 (approach* or care or healthcare or initiative* or innovation* or intervention* or program* or "health service*" or "social service*" or "healthcare service*" or "care service*")).ab.</p> <p>or ((("place based" or "community based" or "area based" or local or proxim* or district* or zone* or territor* or neighbo?rhood) adj3 (approach* or care or healthcare or initiative* or innovation* or intervention* or program* or "health service*" or "social service*" or "healthcare service*" or "care service*")).id.</p> | #1     | 17 056    |
|                                                                                          | <p>((outreach* or "out-reach*" or "reaching out") adj3 (approach* or care or healthcare or initiative* or innovation* or intervention* or program* or "health service*" or "social service*" or "healthcare service*" or "care service*")).ti.</p> <p>or ((outreach* or "out-reach*" or "reaching out") adj3 (approach* or care or healthcare or initiative* or innovation* or intervention* or program* or "health service*" or "social service*" or "healthcare service*" or "care service*")).ab.</p> <p>or ((outreach* or "out-reach*" or "reaching out") adj3 (approach* or care or healthcare or initiative* or innovation* or intervention* or program* or "health service*" or "social service*" or "healthcare service*" or "care service*")).id.</p>                                                                                                                                                                                                                                                 | #2     | 2 330     |
| Community care -<br>Interventions et                                                     | 1 or 2                                                                                                                                                                                                                                                                                                                                                                                                                                                                                                                                                                                                                                                                                                                                                                                                                                                                                                                                                                                                         | #3     | 19 218    |

| Concepts                                                                  | Search strategy keywords                                                                                                                                                                                                                                                                                                                                                                                                                                                                                                                                                                                                                                                                                                                                                                                   | Number | # Results |
|---------------------------------------------------------------------------|------------------------------------------------------------------------------------------------------------------------------------------------------------------------------------------------------------------------------------------------------------------------------------------------------------------------------------------------------------------------------------------------------------------------------------------------------------------------------------------------------------------------------------------------------------------------------------------------------------------------------------------------------------------------------------------------------------------------------------------------------------------------------------------------------------|--------|-----------|
| soins de proximité<br>Total                                               |                                                                                                                                                                                                                                                                                                                                                                                                                                                                                                                                                                                                                                                                                                                                                                                                            |        |           |
| Deprived area -<br>Territoire<br>défavorisé<br>(Controlled<br>vocabulary) | exp aging/ or cross cultural differences/ or at risk populations/ or cultural deprivation/ or exp disabilities/ or disadvantaged/ or health disparities/ or exp homeless/ or lower income level/ or minority groups/ or poverty/ or poverty areas/ or exp "racial and ethnic differences"/ or "race and ethnic discrimination"/ or exp "racial and ethnic groups"/ or refugees/ or exp social deprivation/ or unemployment/                                                                                                                                                                                                                                                                                                                                                                                | #4     | 413 653   |
| Deprived area -<br>Territoire<br>défavorisé (Free<br>vocabulary)          | ("cultural communit*" or depriv* or disabled or disadvantaged or disparit* or elder* or hard-to-reach or inequalit* or inequit* or "low income" or marginal* or poverty or refugee* or senior* or sensitive* or underserved or unemploy* or vulnerable*).ti.<br><br>or ("cultural communit*" or depriv* or disabled or disadvantaged or disparit* or elder* or hard-to-reach or inequalit* or inequit* or "low income" or marginal* or poverty or refugee* or senior* or sensitive* or underserved or unemploy* or vulnerable*).ab.<br><br>or ("cultural communit*" or depriv* or disabled or disadvantaged or disparit* or elder* or hard-to-reach or inequalit* or inequit* or "low income" or marginal* or poverty or refugee* or senior* or sensitive* or underserved or unemploy* or vulnerable*).id. | #5     | 420 092   |
|                                                                           | ((("at-risk" or poor) adj2 (population* or child* or group* or person* or wom?n or m?n)).ti.<br><br>or ((("at-risk" or poor) adj2 (population* or child* or group* or person* or wom?n or m?n)).ab.<br><br>or ((("at-risk" or poor) adj2 (population* or child* or group* or person* or wom?n or m?n)).id.                                                                                                                                                                                                                                                                                                                                                                                                                                                                                                 | #6     | 22 309    |
|                                                                           | ((minority or ethnic* or racial) adj2 (group or groups or population*)).ti.<br><br>or ((minority or ethnic* or racial) adj2 (group or groups or population*)).ab.<br><br>or ((minority or ethnic* or racial) adj2 (group or groups or population*)).id.                                                                                                                                                                                                                                                                                                                                                                                                                                                                                                                                                    | #7     | 33 937    |
|                                                                           | ((aged or old* or ageing or aging) adj2 (adult* or people or person# or population*)).ti.<br><br>or ((aged or old* or ageing or aging) adj2 (adult* or people or person# or population*)).ab.<br><br>or ((aged or old* or ageing or aging) adj2 (adult* or people or person# or population*)).id.                                                                                                                                                                                                                                                                                                                                                                                                                                                                                                          | #8     | 107 248   |

| Concepts                                | Search strategy keywords                                                                                                                                                                                                                                                                                                                                                                                                                                                                                                                                                                                                                                                                                                                                                                                                                                                                                                                                                                                                                                                                                                                                                                                                                                                                                                                                                                                                                                                                                                                                                                                                                                             | Number | # Results |
|-----------------------------------------|----------------------------------------------------------------------------------------------------------------------------------------------------------------------------------------------------------------------------------------------------------------------------------------------------------------------------------------------------------------------------------------------------------------------------------------------------------------------------------------------------------------------------------------------------------------------------------------------------------------------------------------------------------------------------------------------------------------------------------------------------------------------------------------------------------------------------------------------------------------------------------------------------------------------------------------------------------------------------------------------------------------------------------------------------------------------------------------------------------------------------------------------------------------------------------------------------------------------------------------------------------------------------------------------------------------------------------------------------------------------------------------------------------------------------------------------------------------------------------------------------------------------------------------------------------------------------------------------------------------------------------------------------------------------|--------|-----------|
|                                         | (social adj2 (disaffiliation or distance or exclusion or isolation or loneliness)).ti.<br>or (social adj2 (disaffiliation or distance or exclusion or isolation or loneliness)).ab.<br>or (social adj2 (disaffiliation or distance or exclusion or isolation or loneliness)).id.                                                                                                                                                                                                                                                                                                                                                                                                                                                                                                                                                                                                                                                                                                                                                                                                                                                                                                                                                                                                                                                                                                                                                                                                                                                                                                                                                                                     | #9     | 15 488    |
|                                         | 5 or 6 or 7 or 8 or 9                                                                                                                                                                                                                                                                                                                                                                                                                                                                                                                                                                                                                                                                                                                                                                                                                                                                                                                                                                                                                                                                                                                                                                                                                                                                                                                                                                                                                                                                                                                                                                                                                                                | #10    | 550 835   |
| Territoire défavorisé                   | 4 or 10                                                                                                                                                                                                                                                                                                                                                                                                                                                                                                                                                                                                                                                                                                                                                                                                                                                                                                                                                                                                                                                                                                                                                                                                                                                                                                                                                                                                                                                                                                                                                                                                                                                              | #11    | 793 283   |
| Integrated care (Controlled vocabulary) | collaboration/ or cooperation/ or integrated services/ or interdisciplinary research/ or interdisciplinary treatment approach/                                                                                                                                                                                                                                                                                                                                                                                                                                                                                                                                                                                                                                                                                                                                                                                                                                                                                                                                                                                                                                                                                                                                                                                                                                                                                                                                                                                                                                                                                                                                       | #12    | 38 430    |
| Integrated care (Free vocabulary)       | ((collabor* or comprehensive* or cooperat* or coordinat* or co-ord* or "cross disciplin*" or "cross sector*" or "cross institution*" or interagenc* or "inter agenc*" or integrat* or interdisciplin* or "inter disciplin*" or interinstitut* or "inter institut*" or "inter organi?ation*" or interorgani?ation* or interprofession* or "inter profession*" or intersector* or "inter sector*" or multidisciplin* or multi or partnership*) adj2 (care or deliver* or health* or management or model* or program* or service* or system?)).ti.<br><br>or ((collabor* or comprehensive* or cooperat* or coordinat* or co-ord* or "cross disciplin*" or "cross sector*" or "cross institution*" or interagenc* or "inter agenc*" or integrat* or interdisciplin* or "inter disciplin*" or interinstitut* or "inter institut*" or "inter organi?ation*" or interorgani?ation* or interprofession* or "inter profession*" or intersector* or "inter sector*" or multidisciplin* or multi or partnership*) adj2 (care or deliver* or health* or management or model* or program* or service* or system?)).ab.<br><br>or ((collabor* or comprehensive* or cooperat* or coordinat* or co-ord* or "cross disciplin*" or "cross sector*" or "cross institution*" or interagenc* or "inter agenc*" or integrat* or interdisciplin* or "inter disciplin*" or interinstitut* or "inter institut*" or "inter organi?ation*" or interorgani?ation* or interprofession* or "inter profession*" or intersector* or "inter sector*" or multidisciplin* or multi or partnership*) adj2 (care or deliver* or health* or management or model* or program* or service* or system?) ).id. | #13    | 67 897    |

| Concepts        | Search strategy keywords                                                                                                                                                                                                                                                                                                                                                                              | Number | # Results |
|-----------------|-------------------------------------------------------------------------------------------------------------------------------------------------------------------------------------------------------------------------------------------------------------------------------------------------------------------------------------------------------------------------------------------------------|--------|-----------|
|                 | (multicare or multiclinic or multiprogram* or multiservice or multicare or "multi team" or multiteam or "shared care").ti.<br><br>or (multicare or multiclinic or multiprogram* or multiservice or multicare or "multi team" or multiteam or "shared care").ab.<br><br>or (multicare or multiclinic or multiprogram* or multiservice or multicare or "multi team" or multiteam or "shared care" ).id. | #14    | 643       |
|                 | 13 or 14                                                                                                                                                                                                                                                                                                                                                                                              | #15    | 68 397    |
| Integrated care | 12 or 15                                                                                                                                                                                                                                                                                                                                                                                              | #16    | 98 577    |
| Total           | 3 and 11 and 16                                                                                                                                                                                                                                                                                                                                                                                       | #17    | 710       |
| Filter for date | limit 17 to yr="2003 -Current"                                                                                                                                                                                                                                                                                                                                                                        | #18    | 562       |
| Update          | limit 18 to yr="2019 -Current"                                                                                                                                                                                                                                                                                                                                                                        | #19    | 77        |



**Proquest - Sociological Abstracts (2021-02-04)**

| <b>Concepts</b>                                                                          | <b>Search strategy keywords</b>                                                                                                                                                                                                                                                                                                                                                                                                                                                                                                                                                                                                                                                                                                                                                                                                                                                                                                                                                                       | <b>Number</b> | <b># Results</b> |
|------------------------------------------------------------------------------------------|-------------------------------------------------------------------------------------------------------------------------------------------------------------------------------------------------------------------------------------------------------------------------------------------------------------------------------------------------------------------------------------------------------------------------------------------------------------------------------------------------------------------------------------------------------------------------------------------------------------------------------------------------------------------------------------------------------------------------------------------------------------------------------------------------------------------------------------------------------------------------------------------------------------------------------------------------------------------------------------------------------|---------------|------------------|
| Community care -<br>Interventions et<br>soins de proximite<br>(Controlled<br>vocabulary) | Not available                                                                                                                                                                                                                                                                                                                                                                                                                                                                                                                                                                                                                                                                                                                                                                                                                                                                                                                                                                                         | -             | -                |
| Community care -<br>Interventions et<br>soins de proximite<br>(Free vocabulary)          | <p>ti(("place based" OR "community based" OR "area based" OR "local" OR proxim* OR district* OR zone* OR territor* OR neighbo*hood) AND (approach* OR care OR healthcare OR initiative* OR innovation* OR intervention* OR program* OR "health service*" OR "social service*" OR "healthcare service*" OR "care service*"))</p> <p>OR ab(("place based" OR "community based" OR "area based" OR "local" OR proxim* OR district* OR zone* OR territor* OR neighbo*hood) AND (approach* OR care OR healthcare OR initiative* OR innovation* OR intervention* OR program* OR "health service*" OR "social service*" OR "healthcare service*" OR "care service*"))</p> <p>OR su(("place based" OR "community based" OR "area based" OR "local" OR proxim* OR district* OR zone* OR territor* OR neighbo*hood) AND (approach* OR care OR healthcare OR initiative* OR innovation* OR intervention* OR program* OR "health service*" OR "social service*" OR "healthcare service*" OR "care service*"))</p> | #1            | 45 257           |
|                                                                                          | <p>ti((outreach* OR "out-reach*" OR "reaching out") AND (approach* OR care OR healthcare OR initiative* OR innovation* OR intervention* OR program* OR "health service*" OR "social service*" OR "healthcare service*" OR "care service*"))</p> <p>OR ab((outreach* OR "out-reach*" OR "reaching out") AND (approach* OR care OR healthcare OR initiative* OR innovation* OR intervention* OR program* OR "health service*" OR "social service*" OR "healthcare service*" OR "care service*"))</p> <p>OR su((outreach* OR "out-reach*" OR "reaching out") AND (approach* OR care OR healthcare OR initiative* OR innovation* OR intervention* OR program* OR "health service*" OR "social service*" OR "healthcare service*" OR "care service*" ) )</p>                                                                                                                                                                                                                                               | #2            | 1 609            |

| Concepts                                                                  | Search strategy keywords                                                                                                                                                                                                                                                                                                                                                                                                                                                                                                                                                                                                                                                                                                                                                                             | Number | # Results |
|---------------------------------------------------------------------------|------------------------------------------------------------------------------------------------------------------------------------------------------------------------------------------------------------------------------------------------------------------------------------------------------------------------------------------------------------------------------------------------------------------------------------------------------------------------------------------------------------------------------------------------------------------------------------------------------------------------------------------------------------------------------------------------------------------------------------------------------------------------------------------------------|--------|-----------|
| Community care -<br>Interventions et<br>soins de proximit <br>Total       | 1 or 2                                                                                                                                                                                                                                                                                                                                                                                                                                                                                                                                                                                                                                                                                                                                                                                               | #3     | 46 494    |
| Deprived area -<br>Territoire<br>d favoris <br>(Controlled<br>vocabulary) | MAINSUBJECT.EXACT("Aging") OR MAINSUBJECT.EXACT.EXPLODE("Cultural Groups") OR MAINSUBJECT.EXACT.EXPLODE("Deprivation") OR MAINSUBJECT.EXACT("Disadvantaged") OR MAINSUBJECT.EXACT("Elderly") OR MAINSUBJECT.EXACT.EXPLODE("Inequality") OR MAINSUBJECT.EXACT("Loneliness") OR MAINSUBJECT.EXACT.EXPLODE("Low Income Areas") OR MAINSUBJECT.EXACT("Marginality") OR MAINSUBJECT.EXACT("Minority Groups") OR MAINSUBJECT.EXACT.EXPLODE("Poverty") OR MAINSUBJECT.EXACT("Refugees") OR MAINSUBJECT.EXACT("Seniority") OR MAINSUBJECT.EXACT("Social Closure") OR MAINSUBJECT.EXACT("Social Distance") OR MAINSUBJECT.EXACT("Social Isolation") OR MAINSUBJECT.EXACT("Unemployment") OR MAINSUBJECT.EXACT("Vulnerability")                                                                                | #4     | 216 926   |
| Deprived area -<br>Territoire<br>d favoris  (Free<br>vocabulary)          | ti("cultural communit*" OR depriv* OR disabled OR disadvantaged OR disparit* OR elder* OR hard-to-reach OR inequalit* OR inequit* OR "low income" OR marginal* OR poverty OR refugee* OR senior* OR sensitive* OR underserved OR unemploy* OR vulnerable*)<br><br>OR ab("cultural communit*" OR depriv* OR disabled OR disadvantaged OR disparit* OR elder* OR hard-to-reach OR inequalit* OR inequit* OR "low income" OR marginal* OR poverty OR refugee* OR senior* OR sensitive* OR underserved OR unemploy* OR vulnerable*)<br><br>OR su("cultural communit*" OR depriv* OR disabled OR disadvantaged OR disparit* OR elder* OR hard-to-reach OR inequalit* OR inequit* OR "low income" OR marginal* OR poverty OR refugee* OR senior* OR sensitive* OR underserved OR unemploy* OR vulnerable*) | #5     | 237 779   |
|                                                                           | ti(("at-risk" OR "poor") AND (population* OR child* OR group* OR person* OR wom*n OR man OR men))<br><br>OR ab(("at-risk" OR "poor") AND (population* OR child* OR group* OR person* OR wom*n OR man OR men))<br><br>OR su(("at-risk" OR "poor") AND (population* OR child* OR group* OR person* OR                                                                                                                                                                                                                                                                                                                                                                                                                                                                                                  | #6     | 26 897    |

| Concepts                                | Search strategy keywords                                                                                                                                                                                                                                                                                                                                                                                                                                                                                                                   | Number | # Results |
|-----------------------------------------|--------------------------------------------------------------------------------------------------------------------------------------------------------------------------------------------------------------------------------------------------------------------------------------------------------------------------------------------------------------------------------------------------------------------------------------------------------------------------------------------------------------------------------------------|--------|-----------|
|                                         | wom*n OR man OR men )                                                                                                                                                                                                                                                                                                                                                                                                                                                                                                                      |        |           |
|                                         | ti((minority OR ethnic* OR racial) AND (group OR groups OR population*))<br>OR ab((minority OR ethnic* OR racial) AND (group OR groups OR population*))<br>OR su((minority OR ethnic* OR racial) AND (group OR groups OR population*))                                                                                                                                                                                                                                                                                                     | #7     | 131 615   |
|                                         | ti((aged OR old* OR ageing OR aging) AND (adult* OR people OR person OR persons OR population*))<br>OR ab((aged OR old* OR ageing OR aging) AND (adult* OR people OR person OR persons OR population*))<br>OR su((aged OR old* OR ageing OR aging) AND (adult* OR people OR person OR persons OR population*))                                                                                                                                                                                                                             | #8     | 59 151    |
|                                         | ti((social) AND (disaffiliation OR distance OR exclusion OR isolation OR loneliness))<br>OR ab((social) AND (disaffiliation OR distance OR exclusion OR isolation OR loneliness))<br>OR su((social) AND (disaffiliation OR distance OR exclusion OR isolation OR loneliness))                                                                                                                                                                                                                                                              | #9     | 24 364    |
|                                         | 5 or 6 or 7 or 8 or 9                                                                                                                                                                                                                                                                                                                                                                                                                                                                                                                      | #10    | 395 510   |
| Territoire défavorisé                   | 4 or 10                                                                                                                                                                                                                                                                                                                                                                                                                                                                                                                                    | #11    | 450 823   |
| Integrated care (Controlled vocabulary) | MAINSUBJECT.EXACT("Cooperation") OR MAINSUBJECT.EXACT("Coordination") OR MAINSUBJECT.EXACT("Interdisciplinary Approach") OR MAINSUBJECT.EXACT("Interprofessional Approach")                                                                                                                                                                                                                                                                                                                                                                | #12    | 15 014    |
| Integrated care (Free vocabulary)       | ti((collabor* OR comprehensive* OR cooperat* OR coordinat* OR co-ord* OR "cross disciplin*" OR "cross sector*" OR "cross institution*" OR interagenc* OR "inter agenc*" OR integrat* OR interdisciplin* OR "inter disciplin*" OR interinstitut* OR "inter institut*" OR "inter organi*" OR interorgani* OR interprofession* OR "inter profession*" OR intersector* OR "inter sector*" OR multidisciplin* OR multi OR partnership*) AND (care OR deliver* OR health* OR management OR model* OR program* OR service* OR system OR systems)) | #13    | 93 359    |

| Concepts        | Search strategy keywords                                                                                                                                                                                                                                                                                                                                                                                                                                                                                                                                                                                                                                                                                                                                                                                                                                                                                                                                                                                                                                                                                                           | Number | # Results |
|-----------------|------------------------------------------------------------------------------------------------------------------------------------------------------------------------------------------------------------------------------------------------------------------------------------------------------------------------------------------------------------------------------------------------------------------------------------------------------------------------------------------------------------------------------------------------------------------------------------------------------------------------------------------------------------------------------------------------------------------------------------------------------------------------------------------------------------------------------------------------------------------------------------------------------------------------------------------------------------------------------------------------------------------------------------------------------------------------------------------------------------------------------------|--------|-----------|
|                 | <p>OR ab((collabor* OR comprehensive* OR cooperat* OR coordinat* OR co-ord* OR "cross disciplin*" OR "cross sector*" OR "cross institution*" OR interagenc* OR "inter agenc*" OR integrat* OR interdisciplin* OR "inter disciplin*" OR interinstitut* OR "inter institut*" OR "inter organi*ation*" OR interorgani*ation* OR interprofession* OR "inter profession*" OR intersector* OR "inter sector*" OR multidisciplin* OR multi OR partnership*) AND (care OR deliver* OR health* OR management OR model* OR program* OR service* OR system OR systems))</p> <p>OR su((collabor* OR comprehensive* OR cooperat* OR coordinat* OR co-ord* OR "cross disciplin*" OR "cross sector*" OR "cross institution*" OR interagenc* OR "inter agenc*" OR integrat* OR interdisciplin* OR "inter disciplin*" OR interinstitut* OR "inter institut*" OR "inter organi*ation*" OR interorgani*ation* OR interprofession* OR "inter profession*" OR intersector* OR "inter sector*" OR multidisciplin* OR multi OR partnership*) AND (care OR deliver* OR health* OR management OR model* OR program* OR service* OR system OR systems) )</p> |        |           |
|                 | <p>ti(multicare OR multiclinic OR multiprogram* OR multiservice OR multicare OR "multi team" OR multiteam OR "shared care")</p> <p>OR ab(multicare OR multiclinic OR multiprogram* OR multiservice OR multicare OR "multi team" OR multiteam OR "shared care")</p> <p>OR su(multicare OR multiclinic OR multiprogram* OR multiservice OR multicare OR "multi team" OR multiteam OR "shared care" )</p>                                                                                                                                                                                                                                                                                                                                                                                                                                                                                                                                                                                                                                                                                                                             | #14    | 94        |
|                 | 13 or 14                                                                                                                                                                                                                                                                                                                                                                                                                                                                                                                                                                                                                                                                                                                                                                                                                                                                                                                                                                                                                                                                                                                           | #15    | 93 417    |
| Integrated care | 12 or 15                                                                                                                                                                                                                                                                                                                                                                                                                                                                                                                                                                                                                                                                                                                                                                                                                                                                                                                                                                                                                                                                                                                           | #16    | 100 471   |
| Total           | 3 and 11 and 16                                                                                                                                                                                                                                                                                                                                                                                                                                                                                                                                                                                                                                                                                                                                                                                                                                                                                                                                                                                                                                                                                                                    | #17    | 4 113     |
| Filter for date | 17 AND pd(20030101-20211231)                                                                                                                                                                                                                                                                                                                                                                                                                                                                                                                                                                                                                                                                                                                                                                                                                                                                                                                                                                                                                                                                                                       | #18    | 3 149     |

| <b>Concepts</b> | <b>Search strategy keywords</b> | <b>Number</b> | <b># Results</b> |
|-----------------|---------------------------------|---------------|------------------|
| Update          | 17 AND pd(20190918-20211231)    | #19           |                  |

### Web of Science Core Collection (2021-02-04)

| Concepts                                                               | Search strategy keywords                                                                                                                                                                                                                                                                                                                    | Number | # Results |
|------------------------------------------------------------------------|---------------------------------------------------------------------------------------------------------------------------------------------------------------------------------------------------------------------------------------------------------------------------------------------------------------------------------------------|--------|-----------|
| Community care - Interventions et soins de proximite (Free vocabulary) | TS=(("place based" or "community based" or "area based" or local or proxim* or district* or zone* or territor* or neighborhood or neighbourhood) NEAR/2 (approach* or care or healthcare or initiative* or innovation* or intervention* or program* or "health service*" or "social service*" or "healthcare service*" or "care service*")) | #1     | 58 898    |
|                                                                        | TS=((outreach* or "out-reach*" or "reaching out") NEAR/2 (approach* or care or healthcare or initiative* or innovation* or intervention* or program* or "health service*" or "social service*" or "healthcare service*" or "care service*"))                                                                                                | #2     | 5 328     |
| Community care - Interventions et soins de proximite Total             | #1 or #2                                                                                                                                                                                                                                                                                                                                    | #3     | 63 925    |
| Deprived area - Territoire défavorisé (Free vocabulary)                | TS=("cultural communit*" or depriv* or disabled or disadvantaged or disparit* or elder* or hard-to-reach or inequalit* or inequit* or "low income" or marginal* or poverty or refugee* or senior* or sensitive* or underserved or unemploy* or vulnerable*)                                                                                 | #4     | 2 510 825 |
|                                                                        | TS=(("at-risk" or poor) NEAR/1 (population* or child* or group* or person* or woman or women or man or men))                                                                                                                                                                                                                                | #5     | 47 896    |
|                                                                        | TS=((minority or ethnic* or racial) NEAR/1 (group or groups or population*))                                                                                                                                                                                                                                                                | #6     | 67 739    |
|                                                                        | TS=((aged or old* or ageing or aging) NEAR/1 (adult* or people or person\$ or population*))                                                                                                                                                                                                                                                 | #7     | 291 689   |
|                                                                        | TS=((social) NEAR/1 (disaffiliation or distance or exclusion or isolation or loneliness))                                                                                                                                                                                                                                                   | #8     | 22 311    |
|                                                                        | #4 or #5 or #6 or #7 or #8                                                                                                                                                                                                                                                                                                                  | #9     | 2 816 802 |
| Integrated care (Free vocabulary)                                      | TS=((collabor* or comprehensive* or cooperat* or coordinat* or co-ord* or "cross disciplin*" or "cross sector*" or "cross institution*" or interagenc* or "inter agenc*" or integrat* or interdisciplin* or "inter disciplin*" or interinstitut* or "inter institut*" or "inter                                                             | #10    | 468 124   |

| Concepts        | Search strategy keywords                                                                                                                                                                                                                                                                                        | Number | # Results |
|-----------------|-----------------------------------------------------------------------------------------------------------------------------------------------------------------------------------------------------------------------------------------------------------------------------------------------------------------|--------|-----------|
|                 | organisation*" or "inter organization*" or interorganisation* or interorganization* or interprofession* or "inter profession*" or intersector* or "inter sector*" or multidisciplin* or multi or partnership*) NEAR/1 (care or deliver* or health* or management or model* or program* or service* or system\$) |        |           |
|                 | TS=(multicare or multiclinic or multiprogram* or multiservice or multicare or "multi team" or multiteam or "shared care")                                                                                                                                                                                       | #11    | 3 919     |
|                 | #10 or #11                                                                                                                                                                                                                                                                                                      | #12    | 471 442   |
| Total           | #3 and #9 and #12                                                                                                                                                                                                                                                                                               | #13    | 1 178     |
| Filter for date | #3 and #9 and #12<br>Indexes=SCI-EXPANDED, SSCI, A&HCI, CPCI-S, CPCI-SSH, ESCI Timespan=2003-2021                                                                                                                                                                                                               | #14    | 1 069     |

## Érudit (2021-02)

Given the limited computing power of the Érudit database, we had to run two queries to arrive at a result equivalent to those of the other databases. The results were then merged in Endnote and common duplicates between the two queries were removed.

### Request No 1 : English

Date : 2021-02-04

| Concepts                                                               | Search strategy keywords                                                                                                                                                                                                                                                                                                                                                                                                                                                                                                                                                                                                                                                                               | Operator | # Results |
|------------------------------------------------------------------------|--------------------------------------------------------------------------------------------------------------------------------------------------------------------------------------------------------------------------------------------------------------------------------------------------------------------------------------------------------------------------------------------------------------------------------------------------------------------------------------------------------------------------------------------------------------------------------------------------------------------------------------------------------------------------------------------------------|----------|-----------|
| Community care - Interventions et soins de proximité (Free vocabulary) | ( ("place based" OU "community based" OU "area based" OU local OU proxim* OU district* OU zone* OU territor* OU neighborhood OU neighbourhood OU outreach* ou "out-reach*" ou "reaching out") ET (approach* OU care OU healthcare OU initiative* OU innovation* OU intervention* OU program* OU "health service*" OU "social service*" OU "healthcare service*" OU "care service*" )<br>Dans...Titre,résumé, mots-clés                                                                                                                                                                                                                                                                                 | ET       | 80        |
| Deprived area - Territoire défavorisé (Free vocabulary)                | "cultural community" OU "cultural communities" OU depriv* OU disabled OU disadvantaged OU disparit* OU elder* OU hard-to-reach OU inequalit* OU inequit* OU "low income" OU marginal* OU poverty OU refugee* OU senior* OU sensitive* OU underserved OU unemploy* OU vulnerable* OU (("at-risk" OU poor) ET (population* OU child* OU group* OU person* OU woman OU women OU man OU men)) OU ((minority OU ethnic* OU racial) ET (group OU groups OU population*)) OU ((aged OU old* OU ageing OU aging) ET (adult* OU people OU person OU persons OU population*)) OU ((social) ET (disaffiliation OU distance OU exclusion OU isolation OU loneliness))<br>Dans...Titre,résumé, mots-clés            | ET       |           |
| Integrated care (Free vocabulary)                                      | ((collabor* OU comprehensive* OU cooperat* OU coordinat* OU co-ord* OU "cross disciplin*" OU "cross sector*" OU "cross institution*" OU interagenc* OU "inter agenc*" OU integrat* OU interdisciplin* OU "inter disciplin*" OU interinstitut* OU "inter institut*" OU "inter organi?ation*" OU interorgani?ation* OU interprofession* OU "inter profession*" OU intersector* OU "inter sector*" OU multidisciplin* OU multi OU partnership*) ET (care OU deliver* OU health* OU management OU model* OU program* OU service* OU system?))<br>OR multicare OU multiclinic OU multiprogram* OU multiservice OU multicare OU "multi team" OU multiteam OU "shared care"<br>Dans...Titre,résumé, mots-clés | ET       |           |



| Concepts               | Search strategy keywords | Operator | # Results |
|------------------------|--------------------------|----------|-----------|
| Year or range of years | De 2003 à 2021           |          |           |

## Request No 2 : English -Update

Date : 2021-02-05

| Concepts                                                               | Search strategy keywords                                                                                                                                                                                                                                                                                                                                                                                                                                                                                                                                                                                                                                                                            | Operator | # Results |
|------------------------------------------------------------------------|-----------------------------------------------------------------------------------------------------------------------------------------------------------------------------------------------------------------------------------------------------------------------------------------------------------------------------------------------------------------------------------------------------------------------------------------------------------------------------------------------------------------------------------------------------------------------------------------------------------------------------------------------------------------------------------------------------|----------|-----------|
| Community care - Interventions et soins de proximité (Free vocabulary) | ( ("place based" OU "community based" OU "area based" OU local OU proxim* OU district* OU zone* OU territor* OU neighborhood OU neighbourhood OU outreach* ou "out-reach*" ou "reaching out") ET (approach* OU care OU healthcare OU initiative* OU innovation* OU intervention* OU program* OU "health service*" OU "social service*" OU "healthcare service*" OU "care service*") )<br>Dans...Titre,résumé, mots-clés                                                                                                                                                                                                                                                                             | ET       | 14        |
| Deprived area - Territoire défavorisé (Free vocabulary)                | "cultural community" OU "cultural communities" OU depriv* OU disabled OU disadvantaged OU disparit* OU elder* OU hard-to-reach OU inequalit* OU inequit* OU "low income" OU marginal* OU poverty OU refugee* OU senior* OU sensitive* OU underserved OU unemploy* OU vulnerable* OU (("at-risk" OU poor) ET (population* OU child* OU group* OU person* OU woman OU women OU man OU men)) OU ((minority OU ethnic* OU racial) ET (group OU groups OU population*)) OU ((aged OU old* OU ageing OU aging) ET (adult* OU people OU person OU persons OU population*)) OU ((social) ET (disaffiliation OU distance OU exclusion OU isolation OU loneliness))<br>Dans...Titre,résumé, mots-clés         | ET       |           |
| Integrated care (Free vocabulary)                                      | ((collabor* OU comprehensive* OU cooperat* OU coordinat* OU co-ord* OU "cross disciplin*" OU "cross sector*" OU "cross institution*" OU interagenc* OU "inter agenc*" OU integrat* OU interdisciplin* OU "inter disciplin*" OU interinstitut* OU "inter institut*" OU "inter organi?ation*" OU interorgani?ation* OU interprofession* OU "inter profession*" OU intersector* OU "inter sector*" OU multidisciplin* OU multi OU partnership*) ET (care OU deliver* OU health* OU management OU model* OU program* OU service* OU system?)) OR multicare OU multiclinic OU multiprogram* OU multiservice OU multicare OU "multi team" OU multiteam OU "shared care"<br>Dans...Titre,résumé, mots-clés | ET       |           |

| Concepts               | Search strategy keywords | Operator | # Results |
|------------------------|--------------------------|----------|-----------|
| Year or range of years | De 2019 à 2021           |          |           |

### Request no 3 : French

Date : 2021-02-05

| Concepts                                                               | Search strategy keywords                                                                                                                                                                                                                                                                                                                                                                                                                                                                                                                                                                                                                                                                                                                                                                                                              | Operator | # Results |
|------------------------------------------------------------------------|---------------------------------------------------------------------------------------------------------------------------------------------------------------------------------------------------------------------------------------------------------------------------------------------------------------------------------------------------------------------------------------------------------------------------------------------------------------------------------------------------------------------------------------------------------------------------------------------------------------------------------------------------------------------------------------------------------------------------------------------------------------------------------------------------------------------------------------|----------|-----------|
| Community care - Interventions et soins de proximité (Free vocabulary) | (communaut* OU district* OU faubourg* OU local* OU proacti* OU proxim* OU region* OU quartier* OU territor* OU voisin* OU zone* ) ET (approch* OU demarche* OU initiative* OU innovation* OU intervention* OU lutte* OU médecine* OU "prise en charge" OU program* OU santé OU service* OU soin*)<br>Dans...Titre,résumé, mots-clés                                                                                                                                                                                                                                                                                                                                                                                                                                                                                                   | AND      | 173       |
| Deprived area - Territoire défavorisé (Free vocabulary)                | aine* OU appauvri* OU chômage* OU chomeu* OU "communaute culturelle" OU "communautés culturelles" OU defavor* OU demuni* OU denuement OU desavantag* OU "difficile à atteindre" OU "difficile à joindre" OU disparit* OU "faible revenu" OU "faibles revenus" OU handicap* OU inegalit* OU iniquit* OU invalide* OU "mal desservi" OU "mal desservis" OU marginal* OU misere* OU pauvre* OU precarite* OU refugie* OU vulnerab* OU ((risque OU pauvre*) ET (population* OU enfant* OU groupe* OU personne* OU femme* OU homme*)) OU ((minoritaire* OU ethnique* OU racial*) ET (groupe* OU population*)) OU ((age OU ages OU vieillissant*) ET (adulte* Ou personne* OU population*)) OU ((social) ET (desaffiliation* OU distance* OU exclusion* Ou isolation* OU isolement* OU marginalisation*))<br>Dans...Titre,résumé, mots-clés | AND      |           |
| Integrated care (Free vocabulary)                                      | ((collabor* OU complet* OU cooperat* OU coordonn* OU exhaustif* OU global OU integre* OU interdisciplina* OU interinstitution* OU interorganisation* OU interprofessionn* OU intersectoriel* OU inter-sectoriel* OU multidisciplina* OU partenariat* OU pluridisciplina* OU transdisciplina*) ET (administration OU distribu* OU gestion* OU management OU modele* OU program* OU sante OU service* OU soin* OU système?)) OU multisoins* OU multiclinique* OU policlinique* OU multiprogramme* OU multiservice OU "multi-service" OU multiservices OU "multi-services"<br>Dans...Titre,résumé, mots-clés                                                                                                                                                                                                                             | AND      |           |

| Concepts               | Search strategy keywords | Operator | # Results |
|------------------------|--------------------------|----------|-----------|
| Year or range of years | De 2003 à 2021           |          |           |

### Request no 4 : French - Update

Date : 2021-02-05

| Concepts                                                               | Search strategy keywords                                                                                                                                                                                                                                                                                                                                                                                                                                                                                                                                                                                                                                                                                                                                                                                                              | Operator | # Results |
|------------------------------------------------------------------------|---------------------------------------------------------------------------------------------------------------------------------------------------------------------------------------------------------------------------------------------------------------------------------------------------------------------------------------------------------------------------------------------------------------------------------------------------------------------------------------------------------------------------------------------------------------------------------------------------------------------------------------------------------------------------------------------------------------------------------------------------------------------------------------------------------------------------------------|----------|-----------|
| Community care - Interventions et soins de proximité (Free vocabulary) | (communaut* OU district* OU faubourg* OU local* OU proacti* OU proxim* OU region* OU quartier* OU territor* OU voisin* OU zone* ) ET (approch* OU demarche* OU initiative* OU innovation* OU intervention* OU lutte* OU médecine* OU "prise en charge" OU program* OU santé OU service* OU soin*)<br>Dans...Titre,résumé, mots-clés                                                                                                                                                                                                                                                                                                                                                                                                                                                                                                   | AND      | 15        |
| Deprived area - Territoire défavorisé (Free vocabulary)                | aine* OU appauvri* OU chômage* OU chomeu* OU "communaute culturelle" OU "communautes culturelles" OU defavor* OU demuni* OU denuement OU desavantag* OU "difficile à atteindre" OU "difficile à joindre" OU disparit* OU "faible revenu" OU "faibles revenus" OU handicap* OU inegalit* OU iniquit* OU invalide* OU "mal desservi" OU "mal desservis" OU marginal* OU misere* OU pauvre* OU precarite* OU refugie* OU vulnerab* OU ((risque OU pauvre*) ET (population* OU enfant* OU groupe* OU personne* OU femme* OU homme*)) OU ((minoritaire* OU ethnique* OU racial*) ET (groupe* OU population*)) OU ((age OU ages OU vieillissant*) ET (adulte* Ou personne* OU population*)) OU ((social) ET (desaffiliation* OU distance* OU exclusion* Ou isolation* OU isolement* OU marginalisation*))<br>Dans...Titre,résumé, mots-clés | AND      |           |
| Integrated care (Free vocabulary)                                      | ((collabor* OU complet* OU cooperat* OU coordonn* OU exhaustif* OU global OU integre* OU interdisciplina* OU interinstitution* OU interorganisation* OU interprofessionn* OU intersectoriel* OU inter-sectoriel* OU multidisciplina* OU partenariat* OU pluridisciplina* OU transdisciplina*) ET (administration OU distribu* OU gestion* OU management OU modele* OU program* OU sante OU service* OU soin* OU système?)) OU multisoins* OU multiclinique* OU policlinique* OU multiprogramme* OU multiservice OU "multi-service" OU multiservices OU "multi-services"<br>Dans...Titre,résumé, mots-clés                                                                                                                                                                                                                             | AND      |           |
| Year or range of years                                                 | De 2019 à 2021                                                                                                                                                                                                                                                                                                                                                                                                                                                                                                                                                                                                                                                                                                                                                                                                                        |          |           |

## Cairn

Due to the limited computing power of the Cairn database, we had to run four queries and limit ourselves to the use of one concept (Interventions and Community Care). The results were then merged in Endnote and common duplicates between the four queries were removed.

### Request in English

Date : 2021-02-09

| Concepts                                                               | Search strategy keywords                                                                                                                                                                                                                                                                                                                                                                                           | Operator | # Results |
|------------------------------------------------------------------------|--------------------------------------------------------------------------------------------------------------------------------------------------------------------------------------------------------------------------------------------------------------------------------------------------------------------------------------------------------------------------------------------------------------------|----------|-----------|
| Community care - Interventions et soins de proximite (Free vocabulary) | Dans Titre d'article/chapitre : ("place based" OU "community based" OU "area based" OU local OU proxim* OU district* OU zone* OU territor* OU neighborhood OU neighbourhood OU outreach* OU "out-reach*" OU "reaching out") W/2 (approach* OU care OU healthcare OU initiative* OU innovation* OU intervention* OU program* OU "health service*" OU "social service*" OU "healthcare service*" OU "care service*") | ET       | 55        |
| Filtre de date                                                         | Dans Année de parution : Entre 2003 et 2021                                                                                                                                                                                                                                                                                                                                                                        |          |           |

Date : 2021-02-09

| Concepts                                                               | Search strategy keywords                                                                                                                                                                                                                                                                                                                                                                        | Operator | # Results |
|------------------------------------------------------------------------|-------------------------------------------------------------------------------------------------------------------------------------------------------------------------------------------------------------------------------------------------------------------------------------------------------------------------------------------------------------------------------------------------|----------|-----------|
| Community care - Interventions et soins de proximite (Free vocabulary) | Dans Résumé: ("place based" OU "community based" OU "area based" OU local OU proxim* OU district* OU zone* OU territor* OU neighborhood OU neighbourhood OU outreach* OU "out-reach*" OU "reaching out") W/2 (approach* OU care OU healthcare OU initiative* OU innovation* OU intervention* OU program* OU "health service*" OU "social service*" OU "healthcare service*" OU "care service*") | ET       | 178       |
| Filtre de date                                                         | Dans Année de parution : Entre 2003 et 2019                                                                                                                                                                                                                                                                                                                                                     |          |           |

## Request in English-Update

Date : 2021-02-09

| Concepts                                                               | Search strategy keywords                                                                                                                                                                                                                                                                                                                                                                                           | Operator | # Results |
|------------------------------------------------------------------------|--------------------------------------------------------------------------------------------------------------------------------------------------------------------------------------------------------------------------------------------------------------------------------------------------------------------------------------------------------------------------------------------------------------------|----------|-----------|
| Community care - Interventions et soins de proximite (Free vocabulary) | Dans Titre d'article/chapitre : ("place based" OU "community based" OU "area based" OU local OU proxim* OU district* OU zone* OU territor* OU neighborhood OU neighbourhood OU outreach* OU "out-reach*" OU "reaching out") W/2 (approach* OU care OU healthcare OU initiative* OU innovation* OU intervention* OU program* OU "health service*" OU "social service*" OU "healthcare service*" OU "care service*") | ET       | 11        |
| Filtre de date                                                         | Dans Année de parution : Entre 2019 et 2021                                                                                                                                                                                                                                                                                                                                                                        |          |           |

Date : 2021-02-09

| Concepts                                                               | Search strategy keywords                                                                                                                                                                                                                                                                                                                                                                        | Operator | # Results |
|------------------------------------------------------------------------|-------------------------------------------------------------------------------------------------------------------------------------------------------------------------------------------------------------------------------------------------------------------------------------------------------------------------------------------------------------------------------------------------|----------|-----------|
| Community care - Interventions et soins de proximite (Free vocabulary) | Dans Résumé: ("place based" OU "community based" OU "area based" OU local OU proxim* OU district* OU zone* OU territor* OU neighborhood OU neighbourhood OU outreach* OU "out-reach*" OU "reaching out") W/2 (approach* OU care OU healthcare OU initiative* OU innovation* OU intervention* OU program* OU "health service*" OU "social service*" OU "healthcare service*" OU "care service*") | ET       | 23        |
| Filtre de date                                                         | Dans Année de parution : Entre 2019 et 2021                                                                                                                                                                                                                                                                                                                                                     |          |           |

## Request in French

Date : 2021-02-09

| Concepts                                                               | Search strategy keywords                                                                                                                                                                                                                                                                                                          | Operator | # Results |
|------------------------------------------------------------------------|-----------------------------------------------------------------------------------------------------------------------------------------------------------------------------------------------------------------------------------------------------------------------------------------------------------------------------------|----------|-----------|
| Community care - Interventions et soins de proximite (Free vocabulary) | Dans Titre d'article/chapitre : (communaut* OU district* OU faubourg* OU local* OU proacti* OU proxim* OU region* OU quartier* OU territor* OU voisin* OU zone*) W/2 (approch* OU demarche* OU initiative* OU innovation* OU intervention* OU lutte* OU médecine* OU "prise en charge" OU program* OU santé OU service* OU soin*) | ET       | 264       |
| Filtre de date                                                         | Dans Année de parution : Entre 2003 et 2019                                                                                                                                                                                                                                                                                       |          |           |

Date : 2021-02-09

| Concepts                                                               | Search strategy keywords                                                                                                                                                                                                                                                                                       | Operator | # Results |
|------------------------------------------------------------------------|----------------------------------------------------------------------------------------------------------------------------------------------------------------------------------------------------------------------------------------------------------------------------------------------------------------|----------|-----------|
| Community care - Interventions et soins de proximite (Free vocabulary) | Dans Résumé: (communaut* OU district* OU faubourg* OU local* OU proacti* OU proxim* OU region* OU quartier* OU territor* OU voisin* OU zone*) W/2 (approch* OU demarche* OU initiative* OU innovation* OU intervention* OU lutte* OU médecine* OU "prise en charge" OU program* OU santé OU service* OU soin*) | ET       | 666       |
| Filtre de date                                                         | Dans Année de parution : Entre 2003 et 2019                                                                                                                                                                                                                                                                    |          |           |

### Request in French-Update

Date : 2021-02-09

| Concepts                                                               | Search strategy keywords                                                                                                                                                                                                                                                                                                          | Operator | # Results |
|------------------------------------------------------------------------|-----------------------------------------------------------------------------------------------------------------------------------------------------------------------------------------------------------------------------------------------------------------------------------------------------------------------------------|----------|-----------|
| Community care - Interventions et soins de proximite (Free vocabulary) | Dans Titre d'article/chapitre : (communaut* OU district* OU faubourg* OU local* OU proacti* OU proxim* OU region* OU quartier* OU territor* OU voisin* OU zone*) W/2 (approch* OU demarche* OU initiative* OU innovation* OU intervention* OU lutte* OU médecine* OU "prise en charge" OU program* OU santé OU service* OU soin*) | ET       | 42        |
| Filtre de date                                                         | Dans Année de parution : Entre 2019 et 2021                                                                                                                                                                                                                                                                                       |          |           |

Date : 2021-02-09

| Concepts                                                               | Search strategy keywords                                                                                                                                                                                                                                                                                       | Operator | # Results |
|------------------------------------------------------------------------|----------------------------------------------------------------------------------------------------------------------------------------------------------------------------------------------------------------------------------------------------------------------------------------------------------------|----------|-----------|
| Community care - Interventions et soins de proximite (Free vocabulary) | Dans Résumé: (communaut* OU district* OU faubourg* OU local* OU proacti* OU proxim* OU region* OU quartier* OU territor* OU voisin* OU zone*) W/2 (approch* OU demarche* OU initiative* OU innovation* OU intervention* OU lutte* OU médecine* OU "prise en charge" OU program* OU santé OU service* OU soin*) | ET       | 78        |
| Filtre de date                                                         | Dans Année de parution : Entre 2019 et 2021                                                                                                                                                                                                                                                                    |          |           |

## Consulted References

Baker PRA, Francis DP, Soares J, Weightman AL, Foster C. Community wide interventions for increasing physical activity. Cochrane Database of Systematic Reviews 2015, Issue 1. Art. No.: CD008366. DOI: 10.1002/14651858.CD008366.pub3.

Balogh R, McMorris CA, Lunskey Y, Ouellette-Kuntz H, Bourne L, Colantonio A, Gonçalves-Bradley DC. Organising healthcare services for persons with an intellectual disability. Cochrane Database of Systematic Reviews 2016, Issue 4. Art. No.: CD007492. DOI: 10.1002/14651858.CD007492.pub2.

Jia, L., Yuan, B., Huang, F., Lu, Y., Garner, P., & Meng, Q. (2014). Strategies for expanding health insurance coverage in vulnerable populations. Cochrane Database of Systematic Reviews, (11).

Kruis AL, Smidt N, Assendelft WJJ, Gussekloo J, Boland MRS, Rutten-van Mölken M, Chavannes NH. Integrated disease management interventions for patients with chronic obstructive pulmonary disease. Cochrane Database of Systematic Reviews 2013, Issue 10. Art. No.: CD009437. DOI: 10.1002/14651858.CD009437.pub2.

Nieuwboer, M. S., van der Sande, R., van der Marck, M. A., Olde Rikkert, M. G., & Perry, M. (2019). Clinical leadership and integrated primary care: A systematic literature review. *European Journal of General Practice*, 25(1), 7-18.

Rutebemberwa E, Kinengyere AA, Ssengooba F, Pariyo GW, Kiwanuka SN. Financial interventions and movement restrictions for managing the movement of health workers between public and private organizations in low- and middle-income countries. Cochrane Database of Systematic Reviews 2014, Issue 2. Art. No.: CD009845. DOI: 10.1002/14651858.CD009845.pub2.

Sadler, E., Potterton, V., Anderson, R., Khadjesari, Z., Sheehan, K., Butt, F., ... & Sandall, J. (2019). Service user, carer and provider perspectives on integrated care for older people with frailty, and factors perceived to facilitate and hinder implementation: A systematic review and narrative synthesis. *PloS one*, 14(5), e0216488.

Vold, J. H., Aas, C., Leiva, R. A., Vickerman, P., Chalabianloo, F., Løberg, E. M., ... & Fadnes, L. T. (2019). Integrated care of severe infectious diseases to people with substance use disorders; a systematic review. *BMC infectious diseases*, 19(1), 306.

Zonneveld, N., Driessen, N., Stüssgen, R. A. J., Minkman, M. N., (2018). Values of integrated care : A Systematic Review. *International Journal of Integrated Care*, 18(4), 1-12.
