# Supplementary material for: Integrated Community Care Delivered by Public Health-Care and Social-Care Systems: Results from a Realist Synthesis
Source: PubMed Central journal article supplement (PMC10870956; doi:10.5334/ijic.7042), 2024-02-16
Supplement: ijic-24-1-7042-s4.pdf [file ijic-24-1-7042-s4.pdf]

## Appendix 4. List of included and excluded studies

### 4.1 - List of eighteen scientific studies included

| First author (Paper publication)                    | Year | Title                                                                                                                                                 | Language of publication | Country of publication | Source           | Approach                                                                      | Targets all or a large part of the population of a given local area | Deployed by the public health and social care network, with or without collaboration |
|-----------------------------------------------------|------|-------------------------------------------------------------------------------------------------------------------------------------------------------|-------------------------|------------------------|------------------|-------------------------------------------------------------------------------|---------------------------------------------------------------------|--------------------------------------------------------------------------------------|
| Shukor (The Permanente Journal)                     | 2018 | Developing Community-Based Primary Health Care for Complex and Vulnerable Populations in the Vancouver Coastal Health Region: HealthConnection Clinic | English                 | Canada                 | Databases        | Integrated community care (health and social care, localized, cross-sectoral) | Yes                                                                 | Yes                                                                                  |
| Hatano (International Journal of Integrated Care)   | 2017 | The Vanguard of Community-based Integrated Care in Japan: The Effect of a Rural Town on National Policy                                               | English                 | Japan                  | Databases        | Integrated community care (health and social care, localized, cross-sectoral) | Yes                                                                 | Yes                                                                                  |
| Eastwood (International Journal of Integrated Care) | 2019 | Designing an Integrated Care Initiative for Vulnerable Families: Operationalisation of Realist Causal and Programme Theory, Sydney Australia          | English                 | Australia              | Databases        | Integrated community care (health and social care, localized, cross-sectoral) | Yes                                                                 | Yes                                                                                  |
| Eastwood (International Journal of Integrated Care) | 2018 | The Healthy Homes and Neighbourhoods Integrated Care Initiative (conference resume, considered concurrently with 29)                                  | English                 | Australia              | Databases        | Integrated community care (health and social care, localized, cross-sectoral) | Yes                                                                 | Yes                                                                                  |
| Eastwood (International Journal of Integrated Care) | 2020 | Care Coordination for Vulnerable Families in the Sydney Local Health District: What Works for Whom, under What Circumstances,                         | English                 | Australia              | Author follow-up | Integrated community care (health and social care, localized, cross-sectoral) | Yes                                                                 | Yes                                                                                  |

|                                                     |      |                                                                                                                                                        |         |           |           |                                                                               |     |     |
|-----------------------------------------------------|------|--------------------------------------------------------------------------------------------------------------------------------------------------------|---------|-----------|-----------|-------------------------------------------------------------------------------|-----|-----|
|                                                     |      | and Why?                                                                                                                                               |         |           |           |                                                                               |     |     |
| Tennant (BMC Health Services Research)              | 2020 | A critical realist evaluation of an integrated care project for vulnerable families in Sydney, Australia                                               | English | Australia | Databases | Integrated community care (health and social care, localized, cross-sectoral) | Yes | Yes |
| Eastwood (International Journal of Integrated Care) | 2020 | Refining Program Theory for a Place-Based Integrated Care Initiative in Sydney, Australia                                                              | English | Australia | Databases | Integrated community care (health and social care, localized, cross-sectoral) | Yes | Yes |
| Hamiti (Norois)                                     | 2014 | Territorialisation des soins primaires : initiatives des collectivités et des professionnels de santé sur le Massif central pour une autre gouvernance | French  | France    | Databases | Localized and integrated cross-sectoral health care                           | Yes | Yes |
| Segura (Education for Health)                       | 2007 | Towards Unity for Health in the Barceloneta: An Innovative Experience in Community-Based Primary Health Care                                           | English | Spain     | Databases | Localized and integrated cross-sectoral health care                           | Yes | Yes |
| Fournier (Sciences Sociales et Santé)               | 2014 | Concevoir une maison de santé pluri-professionnelle : paradoxes et enseignements d'une initiative en actes                                             | French  | France    | Databases | Localized and integrated cross-sectoral health care                           | Yes | Yes |

|                                                   |      |                                                                                                                                                                                                                                               |         |           |                  |                                                                               |     |     |
|---------------------------------------------------|------|-----------------------------------------------------------------------------------------------------------------------------------------------------------------------------------------------------------------------------------------------|---------|-----------|------------------|-------------------------------------------------------------------------------|-----|-----|
| Dalton (International journal of integrated care) | 2018 | Using the Project Integrate Framework for assessing progress towards care integration: results from a formative evaluation of a complex intervention in Central Coast Local Health D... (conference resume considered concurrently with S9-b) | English | Australia | Databases        | Integrated community care (health and social care, localized, cross-sectoral) | Yes | Yes |
| Dalton (International Journal of Integrated Care) | 2019 | Formative Evaluation of the Central Coast Integrated Care Program (CCICP), NSW Australia                                                                                                                                                      | English | Australia | Author follow-up | Integrated community care (health and social care, localized, cross-sectoral) | Yes | Yes |
| Read (International Journal of Integrated Care)   | 2019 | Using the Project INTEGRATE Framework in Practice in Central Coast, Australia                                                                                                                                                                 | English | Australia | Author follow-up | Integrated community care (health and social care, localized, cross-sectoral) | Yes | Yes |
| Dalton (Evaluation report)                        | 2018 | Central Coast Integrated Care Program: Formative Evaluation Report for the Central Coast Local Health District (report considered concurrently with S9-b)                                                                                     | English | Australia | Author follow-up | Integrated community care (health and social care, localized, cross-sectoral) | Yes | Yes |
| Self (Canadian nurse)                             | 2005 | Street Outreach with No Streets                                                                                                                                                                                                               | English | Canada    | Databases        | Localized and integrated cross-sectoral health care                           | Yes | Yes |
| Castriotta (BMJ Open)                             | 2020 | Measuring the impact of a social programme on healthcare: a 10-year retrospective cohort study in Trieste, Italy                                                                                                                              | English | Italy     | Other            | Integrated community care (health and social care, localized, cross-sectoral) | Yes | Yes |

|                                   |      |                                                                                                                       |         |          |           |                                                                               |     |     |
|-----------------------------------|------|-----------------------------------------------------------------------------------------------------------------------|---------|----------|-----------|-------------------------------------------------------------------------------|-----|-----|
| Di Monaco (SSM Population Health) | 2020 | Promoting health equity through social capital in deprived communities: a natural policy experiment in Trieste, Italy | English | Italy    | Other     | Integrated community care (health and social care, localized, cross-sectoral) | Yes | Yes |
| Leask (AIMS Public Health)        | 2019 | Implementation of a neighbourhood care model in a Scottish integrated context—views from patients                     | English | Scotland | Databases | Integrated community care (health and social care, localized, cross-sectoral) | Yes | Yes |

#### 4.2 - List of selected grey publications (N=8)

| First author (paper publication)                 | Year | Title                                                                                                            | Language of publication | Country of publication | Source (Google scholar, Website, snowbal, other) | Approach                                                                      | Targets all or a large part of the population of a given territory | Deployed by the public health and social care network with or without collaboration |
|--------------------------------------------------|------|------------------------------------------------------------------------------------------------------------------|-------------------------|------------------------|--------------------------------------------------|-------------------------------------------------------------------------------|--------------------------------------------------------------------|-------------------------------------------------------------------------------------|
| Bufileco (Politecnico di Milano)                 | 2008 | The reflective Institution and the city : Space based policies upsetting organisations in TRIESTE                | English                 | Italy                  | Other                                            | Integrated community care (health and social care, localized, cross-sectoral) | Yes                                                                | Yes                                                                                 |
| De Titta (Collection « Recherches » du PUCA)     | 2008 | TRIESTE : La sécurité comme effet collatéral dans la région Frioul Vénétie julienne                              | French or Italian       | Italy                  | Other                                            | Integrated community care (health and social care, localized, cross-sectoral) | Yes                                                                | Yes                                                                                 |
| Bricocoli (European Spatial Research and Policy) | 2012 | Growing old in cities. Council housing Estates in Trieste as laboratories for new perspectives in urban planning | English                 | Italy                  | Other                                            | Integrated community care (health and social care, localized, cross-sectoral) | Yes                                                                | Yes                                                                                 |

| First author (paper publication)             | Year | Title                                                                                                                                                                           | Langage of publication | Country of publication | Source (Google scholar, Website, snowbal, other) | Approach                                                                      | Targets all or a large part of the population of a given territory | Deployed by the public health and social care network with or without collaboration |
|----------------------------------------------|------|---------------------------------------------------------------------------------------------------------------------------------------------------------------------------------|------------------------|------------------------|--------------------------------------------------|-------------------------------------------------------------------------------|--------------------------------------------------------------------|-------------------------------------------------------------------------------------|
| Colle (Trieste Prima)                        | 2018 | La comunità che fa salute le microaree di Trieste per l'equità (treated concurently with 25)                                                                                    | Italian                | Italy                  | Other                                            | Integrated community care (health and social care, localized, cross-sectoral) | Yes                                                                | Yes                                                                                 |
| Morin (IUPLSSS du CIUSSS de l'Estrie - CHUS) | 2017 | Évaluation du déploiement des intervenants dédiés et des changements associés au sein de l'équipe quartier : Intervention de quartier (Sherbrooke) du CIUSSS de l'Estrie - CHUS | French                 | Canada                 | Website                                          | Localized and integrated cross-sectoral social care                           | Yes                                                                | Yes                                                                                 |
| Morin (IUPLSSS du CIUSSS de l'Estrie - CHUS) | 2011 | L'intervention de quartier au CSSS-IUGS une recherche évaluative                                                                                                                | French                 | Canada                 | Website                                          | Localized and integrated cross-sectoral social care                           | Yes                                                                | Yes                                                                                 |
| Morin (IUPLSSS du CIUSSS de l'Estrie - CHUS) | 2015 | L'intervention intersectorielle en santé et services sociaux dans ses liens avec les dimensions de l'habitation et le logement social                                           | French                 | Canada                 | Website                                          | Integrated community care (health and social care, localized, cross-sectoral) | Yes                                                                | Yes                                                                                 |
| Allaire (Private report)                     | 2021 | Évaluation Lac-Mégantic (CMO)                                                                                                                                                   | French                 | Canada                 | Author follow-up                                 | Integrated community care (health and social care, localized, cross-sectoral) | Yes                                                                | Yes                                                                                 |

### 4.3 – List of excluded scientific studies (N=36)

| First author            | Year | Title                                                                                                                                    | Exclusion reason                                                                                          |
|-------------------------|------|------------------------------------------------------------------------------------------------------------------------------------------|-----------------------------------------------------------------------------------------------------------|
| <b>Robertson</b>        | 2017 | Space, time and demographic change A geographical approach to integrating health and social care                                         | Not an empirical study (theoretical study)                                                                |
| <b>Molina</b>           | 2016 | From Design to Action in Clinical and Social Complexity: Continuous Assessment of the Alt Penedés Program                                | Targets a population subgroup (patients with chronic diseases)                                            |
| <b>Shaw</b>             | 2012 | Extending primary care: potential learning from Italy                                                                                    | Targets a population subgroup (elderly patients with long-term illnesses)                                 |
| <b>Pearson</b>          | 2015 | Providing effective and preferred care closer to home: a realist review of intermediate care                                             | Targets a population subgroup (long-term acute care patients)                                             |
| <b>Morton-Chang</b>     | 2017 | iCOACH: Integrated care as boundary spanning: Organizational workarounds in the delivery of community based primary health care          | Initiative not deployed by the public health and social care network                                      |
| <b>Meloche</b>          | 2017 | INTEGRATE: How One Community is Advancing Integrated Care for Seniors                                                                    | Targets a population subgroup (seniors suffering from chronic diseases)                                   |
| <b>Leemrijse</b>        | 2018 | Providing integrated health and social care to vulnerable populations in the community                                                   | Targets a population subgroup (patients with multiple health and psychosocial problems)                   |
| <b>Madsen</b>           | 2018 | Implementation of innovative integrated models of Community-based Primary Healthcare CBPHC in Denmark iCoachDK - a study protocol        | Not an empirical study (realist review)                                                                   |
| <b>Phelan</b>           | 2018 | Challenges in care co-ordination: missed care in community nursing                                                                       | Issue of the specific local area of the intervention                                                      |
| <b>Tuner</b>            | 2019 | Evaluating models of neighbourhood care                                                                                                  | Targets a population subgroup (elderly people at the end of their lives and socially vulnerable)          |
| <b>Pickett</b>          | 2015 | American Journal of Psychiatric Rehabilitation                                                                                           | Targets a population subgroup (homeless people) and specific local area issues                            |
| <b>Eastwood</b>         | 2019 | Sig health and social care working meeting                                                                                               | not an empirical study (reflection on the scope of the foundations of health and social care integration) |
| <b>Tumiel-Berhalter</b> | 2011 | The Implementation of Good for the Neighborhood: A Participatory Community Health Program Model in Four Minority Underserved Communities | Private initiative                                                                                        |
| <b>Cole</b>             | 2008 | The Health Action Zone Initiative: Lessons from Plymouth                                                                                 | Multiple projects evaluation                                                                              |
| <b>Arole</b>            | 2009 | Sustainable transformation of communities: The Jamkhed experience- "We have done it ourselves!" [References]                             | NGO initiative. Accepted approach as an international standard.                                           |

| <b>First author</b> | <b>Year</b> | <b>Title</b>                                                                                                                                                                                                                 | <b>Exclusion reason</b>                                                                                                                                            |
|---------------------|-------------|------------------------------------------------------------------------------------------------------------------------------------------------------------------------------------------------------------------------------|--------------------------------------------------------------------------------------------------------------------------------------------------------------------|
| <b>DeHaven</b>      | 2020        | Designing health care: A community health science solution for reducing health disparities by integrating social determinants and the effects of place                                                                       | Targets a population subgroup and a specific research methodology (community-based participatory research (CBPR) practices for developing place-based initiatives) |
| <b>McCrary</b>      | 2019        | An overview of the role of the district nurse caring for individuals with complex needs                                                                                                                                      | Description of the practice of a single home care worker                                                                                                           |
| <b>Henderson</b>    | 2018        | Regional responses to the challenge of delivering integrated care to older people with mental health problems in rural Australia                                                                                             | Regional area level, remote from the local area                                                                                                                    |
| <b>Inoue</b>        | 2019        | Implementation of a neighbourhood care model in a Scottish integrated context—views from patients                                                                                                                            | Analyses the issues that lead to having health zones closer to the populations to meet the needs. Also, strongly hospital-centred                                  |
| <b>Stone</b>        | 2019        | Investing in the Social Dimensions of Health: Community-based programs can bridge the medical and social worlds to meet older adults' needs                                                                                  | General discussion paper (not an empirical study)                                                                                                                  |
| <b>Aligué</b>       | 2016        | Towards a Collaborative Integrated Healthcare Model in Tona                                                                                                                                                                  | Conference abstract without follow-up information                                                                                                                  |
| <b>McLachlan</b>    | 2016        | Waluwun - an integrated approach towards health and wellbeing in Western NSW, Australia                                                                                                                                      | Conference abstract without follow-up information                                                                                                                  |
| <b>McLachlan</b>    | 2018        | It Pays to be Well Connected - Delivering an integrated system of care in Western New South Wales, Australia                                                                                                                 | Conference abstract without follow-up information                                                                                                                  |
| <b>Becker</b>       | 2005        | An innovative geographical approach: health promotion and empowerment in a context of extreme urban poverty                                                                                                                  | Initiative by an NGO                                                                                                                                               |
| <b>Schulte</b>      | 2017        | Conducting a Health Needs Assessment to Identify Potentials for Population-based Integrated Care Models in Socially Deprived Urban Regions – The Example of the Integrated Care Project “Billstedt-Horn” in Hamburg, Germany | Conference abstract without follow-up information                                                                                                                  |
| <b>McLachlan</b>    | 2017        | Delivering an integrated system of care in Western New South Wales, Australia                                                                                                                                                | Conference abstract without follow-up information                                                                                                                  |
| <b>Stairmand</b>    | 2018        | Prototyping Innovation in Place-Based Integrated Care Teams in Eastern Cheshire                                                                                                                                              | Conference abstract without follow-up information                                                                                                                  |
| <b>Allworth</b>     | 2018        | An exploration of models of care coordination to meet the needs of families requiring health and social care in Sydney, Australia'                                                                                           | Conference abstract without follow-up information                                                                                                                  |

| First author  | Year | Title                                                                                                                                                                       | Exclusion reason                                                              |
|---------------|------|-----------------------------------------------------------------------------------------------------------------------------------------------------------------------------|-------------------------------------------------------------------------------|
| van de Schoot | 2018 | Building Blocks of Knowledge on integrated care for professionals in neighborhood teams                                                                                     | Conference abstract without follow-up information                             |
| Charles       | 2019 | Designing integrated primary care in Toronto Canada                                                                                                                         | Conference abstract without follow-up information                             |
| D'Ambrosio    | 2017 | Coordinated care for older adults utilizing the flourish model - A shared care approach                                                                                     | Conference abstract without follow-up information                             |
| Gray          | 2018 | Mapping for Conceptual Clarity: Exploring, Implementation of Integrated Community-Based Primary - Health Care from a Whole Systems Perspective                              | Targets a population subgroup (elderly with complex needs)                    |
| Anderson      | 2012 | Community Health Centers and the Patient-Centered Medical Home: Challenges and Opportunities to Reduce Health Care Disparities in America                                   | Issue of the specific territory of the intervention                           |
| Morikawa      | 2014 | Towards community-based integrated care: trends and issues in Japan's long-term care policy                                                                                 | Issue of the specific local area of the intervention and no empirical results |
| Robelet       | 2005 | La coordination dans les réseaux de santé : entre logiques gestionnaires et dynamiques professionnelles                                                                     | Issue of the specific local area of the intervention                          |
| Eastwood      | 2019 | Implementation, Mechanisms of Effect and Context of an Integrated Care Intervention for Vulnerable Families in Central Sydney Australia: A Research and Evaluation Protocol | Not an empirical study                                                        |

#### 4.4 – List of grey literature excluded (N=9)

| First author                                         | Year | Title                                                                                                                                                       | Exclusion reason                                     |
|------------------------------------------------------|------|-------------------------------------------------------------------------------------------------------------------------------------------------------------|------------------------------------------------------|
| Le collège des médecins de familles du Canada (CMFC) | 2018 | Innovation in Primary Care: Caring for Unattached and Marginalized Patients                                                                                 | Target population subgroups                          |
| Hass                                                 | 2013 | Les collectivités territoriales et l'offre de soins de proximité                                                                                            | Issue of the specific local area of the intervention |
| Healthcare Improvement Scotland                      | 2019 | Learning from neighbourhood care test sites in Scotland                                                                                                     | Issue of the specific local area of the intervention |
| Morin                                                | 2019 | Cadre de référence à l'intention des établissements : Améliorer l'accès, la qualité et la continuité des services de proximité généraux et de santé mentale | Not an empirical study                               |
| Morin                                                | 2015 | Intervention de proximité en CSSS, une pratique de pointe du CSSS-IUGS : guide d'accompagnement                                                             | Not an empirical study                               |

| <b>First author</b>                                              | <b>Year</b> | <b>Title</b>                                                                                                                                                                                      | <b>Exclusion reason</b>                                                                           |
|------------------------------------------------------------------|-------------|---------------------------------------------------------------------------------------------------------------------------------------------------------------------------------------------------|---------------------------------------------------------------------------------------------------|
| NSW Ministry of Health (Australie)                               | 2018        | NSW Health: Strategic Framework for Integrating Care                                                                                                                                              | Issue of the specific local area of the intervention                                              |
| TransForm Integrated Community Care (Transnational Forum on ICC) | 2018        | 1st Transnational Conference on Integrated Community Care: 'Making the case for Integrated Community Care' (Hamburg, Germany)                                                                     | Summary report of the conference papers, discussions and lessons learned                          |
| TransForm Integrated Community Care (Transnational Forum on ICC) | 2019        | 2nd Transnational Conference on Integrated Community Care: "Towards People-Driven Care" Engaging and Empowering Individuals, Carers and Families through Integrated Community Care (Turin, Italy) | Preparatory document and summary report of the conference papers, discussions and lessons learned |
| TransForm Integrated Community Care (Transnational Forum on ICC) | 2019        | 3rd Transnational Conference on Integrated Community Care: 'Building stronger communities through Integrated Community Care' (Vancouver – Canada)                                                 | Preparatory document and summary report of the conference                                         |
