# Supplementary material for: Integrated Community Care Delivered by Public Health-Care and Social-Care Systems: Results from a Realist Synthesis
Source: PubMed Central journal article supplement (PMC10870956; doi:10.5334/ijic.7042), 2024-02-16

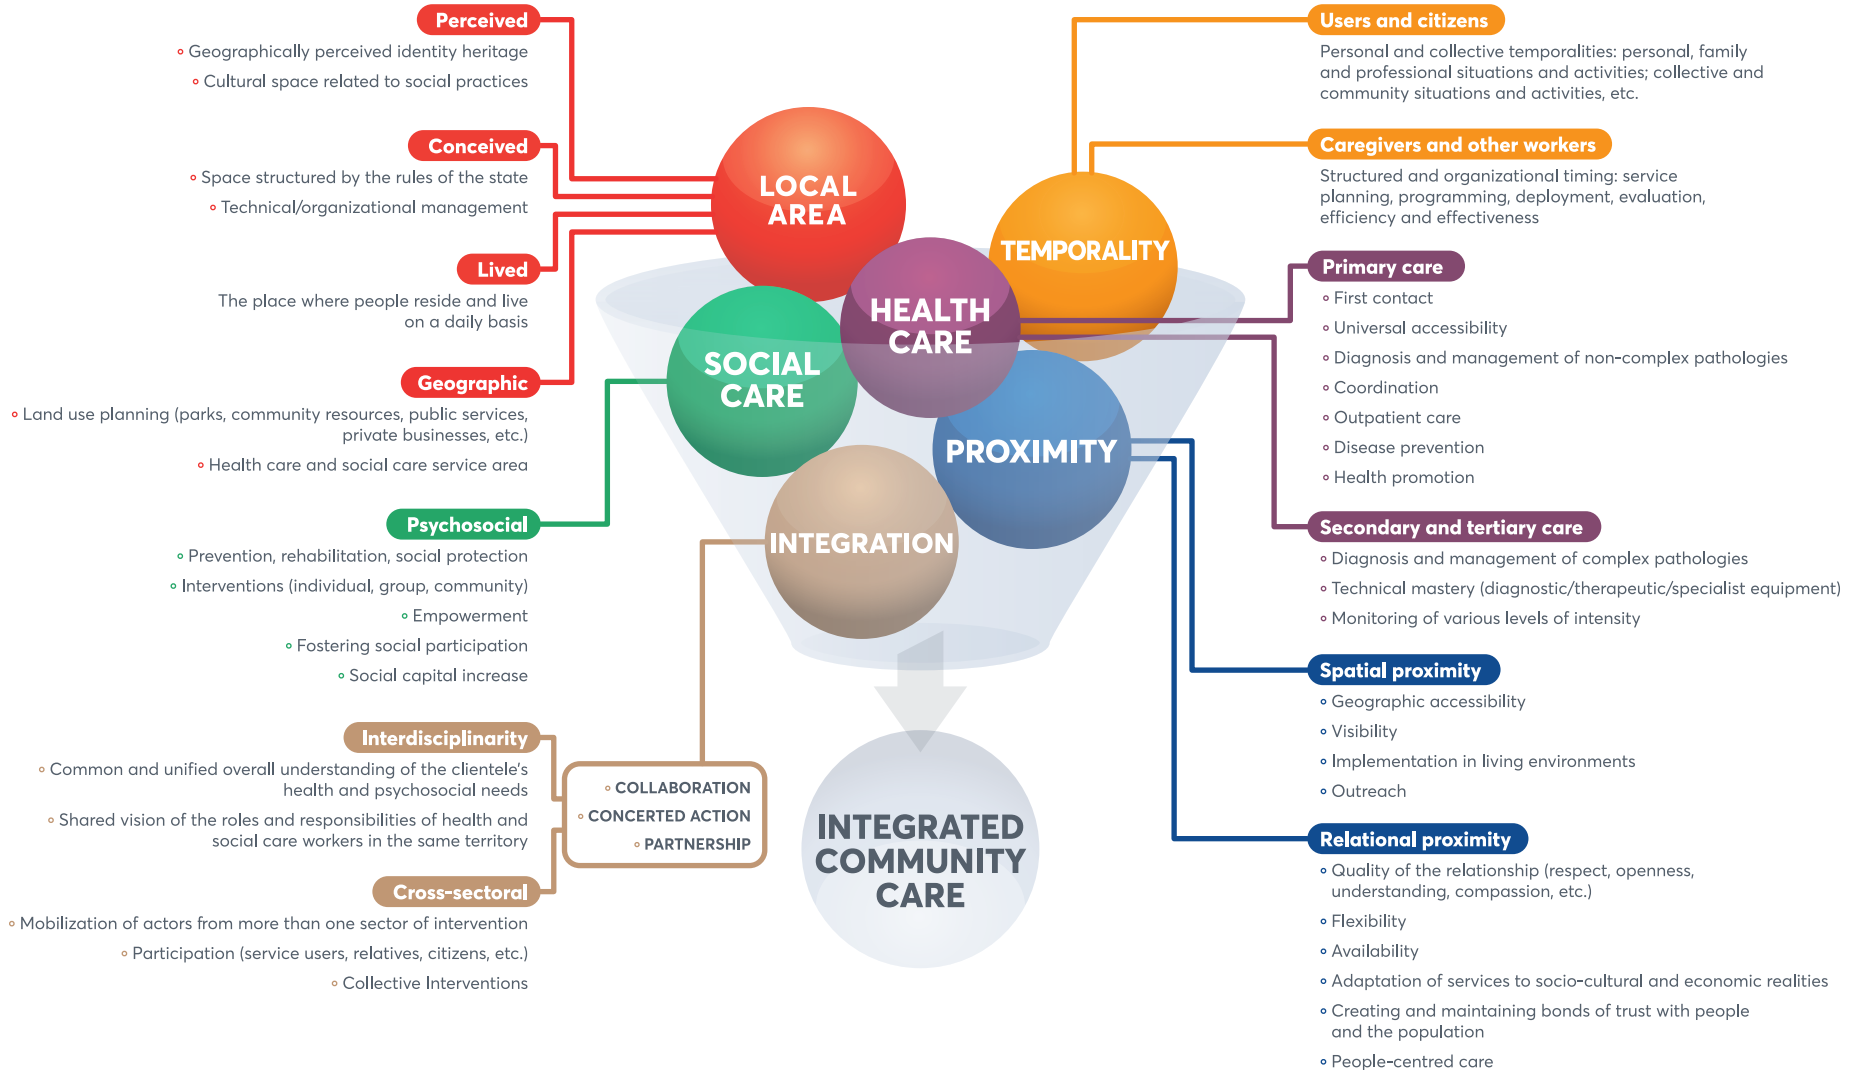

Supplement: ijic-24-1-7042-s6.pdf [file ijic-24-1-7042-s6.pdf]
